# Supplementary material for: I-ACT: Integrated study on effect of Activity on ComplicaTions in pregnancy: study protocol of a multiethnic prospective cohort study
Source: PubMed Central journal article supplement — BMJ Open. 2019 Apr 3;9(4):e025970. doi: 10.1136/bmjopen-2018-025970 (PMC6500272; doi:10.1136/bmjopen-2018-025970), 2019-04-03
Supplement: bmjopen-2018-025970.draft_revisions.pdf [file bmjopen-2018-025970.draft_revisions.pdf]

# BMJ Open

BMJ Open is committed to open peer review. As part of this commitment we make the peer review history of every article we publish publicly available.

When an article is published we post the peer reviewers' comments and the authors' responses online. We also post the versions of the paper that were used during peer review. These are the versions that the peer review comments apply to.

The versions of the paper that follow are the versions that were submitted during the peer review process. They are not the versions of record or the final published versions. They should not be cited or distributed as the published version of this manuscript.

BMJ Open is an open access journal and the full, final, typeset and author-corrected version of record of the manuscript is available on our site with no access controls, subscription charges or pay-per-view fees (<http://bmjopen.bmj.com>).

If you have any questions on BMJ Open's open peer review process please email [info.bmjopen@bmj.com](mailto:info.bmjopen@bmj.com)

# BMJ Open

## **I-ACT: Integrated study on effect of Activity on ComplicaTions in pregnancy – study protocol of a multi-ethnic prospective cohort study**

|                               |                                                                                                                                                                                                                  |
|-------------------------------|------------------------------------------------------------------------------------------------------------------------------------------------------------------------------------------------------------------|
| Journal:                      | <i>BMJ Open</i>                                                                                                                                                                                                  |
| Manuscript ID                 | bmjopen-2018-025970                                                                                                                                                                                              |
| Article Type:                 | Protocol                                                                                                                                                                                                         |
| Date Submitted by the Author: | 10-Aug-2018                                                                                                                                                                                                      |
| Complete List of Authors:     | Cai, Meijin; Duke-NUS Medical School,<br>Tan, Kok Hian; KK Women's and Children's Hospital, Division of Obstetrics and Gyneacology<br>Ang, Seng Bin; KK Women's and Children's Hospital, Family Medicine Service |
| Keywords:                     | Diabetes in pregnancy < DIABETES & ENDOCRINOLOGY, Maternal medicine < OBSTETRICS, PREVENTIVE MEDICINE, PRIMARY CARE                                                                                              |
|                               |                                                                                                                                                                                                                  |

SCHOLARONE™  
Manuscripts

View Only

1  
2  
3 **MANUSCRIPT TITLE:**  
4  
5  
6  
7  
8

9 I-ACT: Integrated study on effect of Activity on ComplicaTions in  
10 pregnancy – study protocol of a multi-ethnic prospective cohort study  
11  
12  
13  
14  
15  
16

17 Meijin Cai, BSc Hons<sup>1,a</sup>; Kok Hian Tan, MBBS<sup>2,b</sup>; and Seng Bin Ang,  
18 MBBS<sup>1,3,4,5,c</sup>.  
19  
20  
21  
22

23  
24 <sup>1</sup>Duke-NUS Medical School, Singapore, Singapore

25 <sup>2</sup>Department of Maternal Fetal Medicine, KK Women's and Children's Hospital,  
26 Singapore, Singapore

27 <sup>3</sup>Lee Kong Chian School of Medicine, Nanyang Technological University, Singapore,  
28 Singapore

29 <sup>4</sup>Yong Loo Lin School of Medicine, National University of Singapore, Singapore

30 <sup>5</sup>Family Medicine Service, KK Women's and Children's Hospital, Singapore,  
31 Singapore  
32  
33

34  
35  
36 Email:

37  
38 <sup>a</sup>[caimeijin8@gmail.com](mailto:caimeijin8@gmail.com); [e0008507@u.duke.nus.edu](mailto:e0008507@u.duke.nus.edu)

39 <sup>b</sup>[tan.kok.hian@singhealth.com.sg](mailto:tan.kok.hian@singhealth.com.sg)

40 <sup>c</sup>[ang.seng.bin@singhealth.com.sg](mailto:ang.seng.bin@singhealth.com.sg)  
41  
42  
43

44 \*Corresponding author:

45 Dr. Ang Seng Bin (MBBS)

46 Head and Consultant

47 Family Medicine Service

48 KK Women's and Children's Hospital

49 100 Bukit Timah Road

50 Singapore 229899

51 Phone: +65 63941102

52 Email: [ang.seng.bin@singhealth.com.sg](mailto:ang.seng.bin@singhealth.com.sg)  
53  
54  
55  
56  
57

## Abstract

**Introduction:** Physical activity (PA) during first 20 weeks of pregnancy may lower risks of gestational diabetes mellitus (GDM) and gestational hypertension (GH), though evidence of association remains inconclusive. Current studies rely heavily on subjective assessment of PA levels. Wearable activity trackers provide a convenient and objective surrogate index for PA validated by evidence-based steps/day categorization along a physical inactivity/activity continuum. I-ACT primarily aims to examine objectively measured PA levels and patterns in first and second trimesters of pregnancy and the association with GDM and/or GH in Singapore, a multi-ethnic Asian population. Secondary aims include investigating the bio-socio-demographic factors associated with sedentary behavior, and association of early pregnancy PA level with maternal weight at 6 weeks post-delivery. Results may facilitate identification of high-risk mothers-to-be and formulation of interventional strategies.

**Methods and analysis:** Prospective cohort study that will recruit 408 women at first antenatal visit at <12 weeks gestation. Baseline bio-socio-demographic factors and PA levels assessed by participant characteristics form and the International Physical Activity Questionnaire (IPAQ) respectively. An activity tracker (Fitbit) will be provided to be worn daily from date of recruitment to end of 20 weeks gestation. Tracker-recorded data will be synchronized with an application on participant's smartphone. Compliance will be reinforced with fortnightly reminders. After 20 weeks, a second IPAQ and a feedback form will be administered. GDM screened at 24-28 weeks gestation. GH diagnosed after 20 weeks gestation. Maternal weight assessed at 6 weeks post-delivery. Appropriate statistical tests will be used to compare continuous and categorical PA measurements between first and second trimesters. Logistic regression will be used to analyse associations.

**Ethics and dissemination:** Ethical approval obtained from the Centralised Institutional Review Board of SingHealth (reference 2017/2836). Dissemination of results will be via peer-reviewed research publications both online and in print, conference presentations, posters, and medical forums.

(299 words)

**Keywords:** Physical activity, gestational diabetes mellitus, pregnancy-induced hypertension, pregnancy

1  
2  
3 Article summary

4 **Strengths and limitations of this study**

- 5  
6  
7  
8  
9  
10  
11  
12  
13  
14  
15  
16  
17  
18  
19  
20  
21  
22  
23  
24  
25  
26  
27  
28  
29  
30  
31  
32  
33  
34  
35  
36  
37  
38  
39  
40  
41  
42  
43  
44  
45  
46  
47  
48  
49  
50  
51  
52  
53  
54  
55  
56  
57  
58  
59  
60
- Prospective cohort study of a multi-ethnic Asian population
  - Objective measurement of PA levels and patterns in early pregnancy
  - Data collection designed to minimize recall bias
  - Participant non-compliance despite reinforcement measures
  - Participants' unfamiliarity with wearable activity tracker and mobile application despite education at recruitment

For peer review only

## Introduction

Physical activity (PA) is defined as any bodily movement produced by skeletal muscles that results in energy expenditure<sup>1</sup>. Current recommendations encourage women with uncomplicated pregnancies to continue or initiate safe physical activities in pregnancy<sup>2</sup>. More specifically, the CDC recommends 30 min/day for five days each week of moderate-intensity aerobic activity, which can be met by walking<sup>3</sup>. Concerns about safety have been refuted by literature demonstrating that moderate exercise in low-risk pregnancy improves maternal well-being without associated risks of birth weight reduction or preterm birth<sup>4</sup>.

Physical inactivity or sedentary behavior in early pregnancy (<20 weeks gestation) is a potential modifiable risk factor for two common obstetric complications, gestational diabetes mellitus (GDM) and gestational hypertension (GH). GDM is defined as carbohydrate intolerance that develops during pregnancy<sup>5</sup>. It complicates 1.8-25.1% of pregnancies worldwide depending on country and definition, with South-East Asia having the second highest prevalence at 8.1-18.3<sup>6</sup>. Approximately 8-20% of pregnancies are affected in Singapore<sup>7</sup>. Overall prevalence of GH, otherwise known as pregnancy-induced hypertension, is estimated at 10-12%<sup>8,9</sup>, though the local incidence has not been established. Perinatal sequelae of GDM and GH include macrosomia, neonatal hypoglycemia, preterm birth, intrauterine growth restriction (IUGR), and low APGAR scores. Both metabolic disorders are also proven risk factors of future type 2 diabetes<sup>10</sup>.

Current literature investigating the association between PA in early pregnancy and the development of GDM has shown a significant risk reduction of up to 24%<sup>11-14</sup>, though a few other studies have found a null association<sup>15,16</sup>. The association with GH is even less clear from the limited literature available<sup>17-20</sup>. All these studies utilised questionnaires as a measurement of PA. Studies that incorporate an objective means of measurement have been scarce<sup>21,22</sup>, which may partially explain the inconclusive evidence of association thus far. A Norway-based study investigating objectively recorded PA in early pregnancy and GDM reported that the adjusted odds ratio for GDM decreased 19% with every 3159 step-increase per day<sup>21</sup>. Based on these existing studies, physical inactivity in early pregnancy is a modifiable risk factor worth targeting

This is especially so in the Asian population. PA during first half of pregnancy has been shown to be low in an Asian urban setting<sup>23</sup>, and similarly lower when compared to non-Asian counterparts<sup>22,24</sup>. In Singapore, no published study on objectively measured PA levels in pregnancy could be found, and studies on association of subjectively-measured early pregnancy PA levels with both obstetric complications are rare. Padmapriya *et al.* investigated the change in PA levels from a pre-pregnancy to pregnancy state using a structured self-constructed questionnaire administered at 26-28 weeks gestation scored based on the International Physical Activity Questionnaire (IPAQ) short form<sup>25</sup>. The same study group further reported that a higher PA during the first 6 months of pregnancy was associated with lower prevalence of GDM, especially among overweight/obese women<sup>26</sup>. However, the utilisation of a questionnaire at 26-28 weeks gestation that relied on recall of PA levels during first 6 months of pregnancy and the year before subjected the results to a high level of recall bias. Therefore, the paucity of local research on objectively-measured PA levels in early pregnancy and association with obstetric metabolic outcomes warrants additional prospective studies.

1  
2  
3 As evident from existing studies, current assessment of pregnancy PA levels relies heavily on  
4 subjective, self-reporting questionnaires deemed to be the most feasible method with the  
5 absence of a gold standard and clear guidelines<sup>27</sup>. The inclusion of more objective  
6 measurements is being advocated<sup>28</sup>. Consumer wearable activity trackers operate through a 3-  
7 axis accelerometer, providing an alternative convenient and objective means of assessing PA  
8 levels during pregnancy. The accuracy, reliability and efficacy of wearable activity trackers  
9 in various health programs have been validated<sup>29-32</sup>. Steps per day categorization along a  
10 physical inactivity/activity continuum based on CDC recommendation has also been  
11 elucidated, with 5000 (sedentary) and 10,000 (active) being the primary anchor points<sup>33</sup>. The  
12 correlation between steps per day and activity counts per day, from which activity intensity  
13 and duration were derived, was proven to be positive and strong, thus validating its use as an  
14 index for PA<sup>34</sup>. Step count estimated by Fitbit activity trackers in particular has also been  
15 validated in a separate study<sup>35</sup>.

18 Through the use of both Fitbit activity trackers and the IPAQ, this prospective multi-ethnic  
19 cohort study primarily aims to investigate the PA levels and patterns in early pregnancy (1st  
20 trimester and 2nd trimester up to 20 weeks gestation), as well as the effect of PA in early  
21 pregnancy on development of GDM and/or GH. Secondary aims include assessing the bio-  
22 socio-demographic factors associated with sedentary behavior, and examining the association  
23 between early pregnancy PA level and maternal weight at 6 weeks post-delivery.  
24  
25  
26  
27  
28  
29  
30  
31  
32  
33  
34  
35  
36  
37  
38  
39  
40  
41  
42  
43  
44  
45  
46  
47  
48  
49  
50  
51  
52  
53  
54  
55  
56  
57

## Methods and analysis

### **Study design**

In this prospective cohort study, pregnant women will be recruited at outpatient clinics in KK Women's and Children's Hospital, a major public hospital in Singapore that sees a high volume of obstetrics & gynaecology consultations.

### **Recruitment and eligibility criteria**

All obstetricians running outpatient general obstetrics & gynaecology clinics will refer suitable candidates for recruitment. All recruitment will be done via face-to-face contact by the research team.

Inclusion criteria are singleton pregnancy, first antenatal visit less than 12 weeks gestation, and ages between 21 and 50 years old inclusive. Exclusion criteria are severe medical and/or psychological co-morbidity (including New York Heart Association (NYHA) class IV heart failure, end-stage renal disease, assistive device-dependent for mobility, cognitive impairment, and loss of rational thinking), and skin conditions (including contact dermatitis, pemphigus vulgaris and bullous pemphigoid) precluding the wearing of activity trackers.

### **Power analysis**

Given that prevalence of GH has not been investigated in Singapore, GDM prevalence is used instead. Assuming that GDM proportion is 17.6%<sup>36</sup> and that PA can reduce risk of GDM by 30%, a sample of 367 mothers will be required at 80% power and 5% level of significance. Assuming a dropout rate of 10%, a sample of 408 mothers will be recruited into the study.

### **Participant timeline**

Recruitment is at first antenatal visit less than 12 weeks gestation, during which Fitbit education, International Physical Activity Questionnaire (IPAQ) and participant characteristics form are done (Fig. 1). PA level monitoring occurs henceforth until end of 20 weeks gestation inclusive. The standard 4-weekly antenatal visits will continue during this period. After 20 weeks gestation, a second IPAQ and a feedback form are administered either at regular antenatal visits before 24 weeks gestation, or over the phone/email. Routine GDM screening takes place between 24 and 28 weeks gestation. The final follow-up occurs at the 6th week after delivery to obtain participants' weight.

### **Ensuring compliance**

Approaches to enhance compliance include reinforcing the importance of commitment to wearing the activity trackers daily at the time of recruitment, and making fortnightly follow-



up calls up until 20 weeks gestation. Compliance will also be recorded as part of Fitbit use assessment in the participant feedback form at the end of 20 weeks gestation.

## Outcome measures

Primary outcomes include the following:

- GDM – diagnosed if the following threshold value at any time point is exceeded after a 75 g oral glucose tolerance test (OGTT) between 24 and 28 weeks gestation based on the International Association of Diabetes and Pregnancy Study Groups (IADPSG) criteria: fasting venous plasma glucose of  $\geq 5.1$  mmol/L, 1-hour venous plasma glucose of  $\geq 10.0$  mmol/L, and 2-hour venous plasma glucose  $\geq 8.5$  mmol/L<sup>37</sup>.
- GH – diagnosed as new onset hypertension (systolic blood pressure  $\geq 140$  mmHg and/or diastolic blood pressure  $\geq 90$  mmHg) measured on two occasions at least four hours apart after 20 weeks gestation in the absence of proteinuria or new signs of end-organ dysfunction<sup>38</sup>.

Secondary outcomes include the following:

- Weight at 6 weeks post-delivery
- Weight gain in pregnancy
- Intrauterine growth restriction (IUGR)
- Preterm birth (GA <37 weeks)
- Macrosomia (BW >4.5kg)
- Neonatal hypoglycemia (glucose <2.5 mmol/L)
- Pre-eclampsia
- APGAR scores

## Data collection

### *Research participant characteristics form*

Sociodemographic data to be assessed include marital status, educational level, household income, type of housing, working status during pregnancy, smoking status, and alcohol consumption. Medical history including pre-pregnancy height and weight, parity, history of infertility treatment, existing chronic illnesses, history of GDM and/or GH, family history of DM, and reasons behind potential PA restriction during early pregnancy will also be collected.

### *Fitbit activity tracker and mobile application*

At recruitment, each participant is given a wristband activity tracker (Fitbit) that will be connected via Bluetooth to a Fitbit application downloaded onto her smartphone. Education on device and application will be carried out. The tracker is worn daily from recruitment to end of 20 weeks gestation inclusive, except during bathing or water activities. Participants are advised to synchronize the tracker data at least once a week. For data to be valid, wear-time must be at least 4 days per week (including one weekend day) and at least 10 hours per day.

Steps per day will be recorded by the tracker. Data will be reported as continuous and categorical variables. Continuous variables include mean weekday and weekend steps per day and mean steps per day in first and second trimesters. Categorical variables include classification into a CDC recommendation-based steps per day physical inactivity/activity continuum defined as follows: (1) <5000 (sedentary); (2) 5000-7499 (low active); (3) 7500-9999 (somewhat active); (4) 10,000-12,499 (active); and (5)  $\geq 12,500$  (highly active)<sup>33</sup>.

### ***International Physical Activity Questionnaire (IPAQ)***

The IPAQ long version will be self-administered during the first visit at less than 12 weeks gestation in the first trimester and again between 20-24 weeks gestation in the second trimester. It is a set of 4 questionnaires assessing 5 activity domains (occupation, transportation, household, leisure, and sedentary) independently in the past 7 days, and may be administered via self or telephone<sup>39</sup>. Well-established and validated in adults aged 15-69 years, it is available in both English and Chinese<sup>40,41</sup>. It has been used in studies involving pregnant women<sup>28,42</sup>.

Data will be reported as continuous and categorical variables. Continuous variables include median MET-minutes per week (MET-min/wk) and interquartile ranges computed for each domain, subdomain (walking, moderate-intensity PA and vigorous-intensity PA) and overall total PA. MET or metabolic equivalent is a unit that measures energy expenditure in multiples of the resting metabolic rate<sup>43</sup>. Categorical variables include classification into low, moderate, high levels of PA according to the IPAQ scoring protocol.

### ***Medical record data***

Additional data to be collected include ethnicity, weight changes during pregnancy, weight at 6 weeks post-delivery, obstetric outcomes of GDM, GH, preeclampsia and IUGR, and neonatal outcomes comprising APGAR scores, preterm birth, macrosomia, and neonatal hypoglycemia.

### ***Participant feedback form***

After the end of 20 weeks gestation, experience with the activity tracker and mobile application in terms of usability and troubleshooting will be evaluated. Compliance level will be quantified by number of days per week.

### ***Statistics***

Descriptive statistics of PA levels in the 1st and early 2nd trimester will be presented. Mean steps per day and median MET-minutes per week between semesters will be compared using paired Student's t-test and Wilcoxon signed-rank test respectively. McNemar's test will be used to compare sedentary behavior between semesters. Similar tests will be used to assess for a difference in PA levels between weekdays and weekends.

1  
2  
3 Logistic regression will be used to evaluate bio-socio-demographic factors associated with  
4 sedentary behavior, and the effect of early pregnancy PA on GDM and/or GH.

5  
6 Statistical analyses will be performed using IBM SPSS Statistics version 23.0 (IBM Corp.,  
7 Armonk, N.Y., USA). *P* values of <0.05 will be considered statistically significant.

### 8 9 10 **Safety parameters**

11  
12 Adverse effects and device monitoring will be carried out at the subsequent 4-weekly routine  
13 prenatal visits. Any adverse skin reaction to the wristband will be recorded. Participation will  
14 be stopped at any time the Principal Investigator decides that continuing on could be harmful  
15 to the participant.

### 16 17 18 **Data management**

19  
20 All data will be coded for confidentiality. Hardcopy data will be stored at the research site  
21 under lock and key. Electronic data can only be accessed and retrieved from the secured  
22 website by the participant and research team. All data obtained will be entered into and stored  
23 on the institution Research Electronic Data Capture (REDCap) system, a centralised secured  
24 data management server with password access. Data integrity monitoring will be carried out  
25 monthly by the principal investigator and co-investigators if deemed necessary.

### 26 27 28 29 30 31 32 33 34 35 36 37 38 39 40 41 42 43 44 45 46 47 48 49 50 51 52 53 54 **Ethics and dissemination**

1  
2  
3 Ethical approval was obtained from the Centralised Institutional Review Board of SingHealth  
4 (reference 2017/2836). Informed written consent will be sought from all participants.  
5

6 Results from this study will be submitted to the funding organization and peer-reviewed  
7 journals for consideration of publication both online and in print. Results will also be  
8 presented at relevant meetings, conferences and medical forums in either oral or poster  
9 formats.  
10  
11  
12  
13  
14  
15  
16  
17  
18  
19  
20  
21  
22  
23  
24  
25  
26  
27  
28  
29  
30  
31  
32  
33  
34  
35  
36  
37  
38  
39  
40  
41  
42  
43  
44  
45  
46  
47  
48  
49  
50  
51  
52  
53  
54

## 55 Conclusion

1  
2  
3 The I-ACT study aims to be the first comprehensive study objectively evaluating the PA  
4 levels and patterns in early pregnancy, and their association with GDM and/or GH in the  
5 multi-ethnic population of Singapore. In addition to addressing these important scientific  
6 knowledge gaps, from a clinical perspective, the study itself may increase awareness of PA  
7 during early pregnancy while demonstrating the potential of wearable activity trackers as an  
8 objective measure of PA in health research. More importantly, we hope the results of the  
9 study facilitate the identification of high-risk mothers-to-be for targeted intervention, and  
10 help formulate strategies for interventional efforts.  
11  
12  
13  
14  
15  
16  
17  
18  
19  
20  
21  
22  
23  
24  
25  
26  
27  
28  
29  
30  
31  
32  
33  
34  
35  
36  
37  
38  
39  
40  
41  
42  
43  
44  
45  
46  
47  
48  
49  
50  
51  
52  
53  
54

### 55 Acknowledgements

1  
2  
3 The authors would like to thank Professor Satvinder Singh Dhaliwal for providing statistical  
4 advice during the conception of this study.  
5  
6  
7  
8  
9  
10  
11  
12  
13  
14  
15  
16  
17  
18  
19  
20  
21  
22  
23  
24  
25  
26  
27  
28  
29  
30  
31  
32  
33  
34  
35  
36  
37  
38  
39  
40  
41  
42  
43  
44  
45  
46  
47  
48  
49  
50  
51  
52  
53  
54  
55

## 56 References

1. Caspersen CJ, Powell KE, Christenson GM. Physical activity, exercise, and physical fitness: definitions and distinctions for health-related research. *Public Health Rep.* 1985;100(2):126-131.
2. ACOG Committee Opinion No. 650: Physical Activity and Exercise During Pregnancy and the Postpartum Period. *Obstet Gynecol.* 2015;126(6):e135-142.
3. Centre for Disease Control and Prevention. <https://www.cdc.gov/physicalactivity/basics/pregnancy/index.htm>. Accessed 10 July, 2017.
4. Nascimento SL, Surita FG, Cecatti JG. Physical exercise during pregnancy: a systematic review. *Current opinion in obstetrics & gynecology.* 2012;24(6):387-394.
5. Bulletins-Obstetrics CoP. ACOG Practice Bulletin No. 190: Gestational Diabetes Mellitus. *Obstet Gynecol.* 2018;131(2):e49-e64.
6. Zhu Y, Zhang C. Prevalence of Gestational Diabetes and Risk of Progression to Type 2 Diabetes: a Global Perspective. *Curr Diab Rep.* 2016;16(1):7.
7. Yew TW, Khoo CM, Thai AC, Kale AS, Yong EL, Tai ES. The Prevalence of Gestational Diabetes Mellitus Among Asian Females is Lower Using the New 2013 World Health Organization Diagnostic Criteria. *Endocr Pract.* 2014;20(10):1064-1069.
8. Lim WY, Saw SM, Tan KH, Yeo GS, Kwek KY. A cohort evaluation on arterial stiffness and hypertensive disorders in pregnancy. *BMC Pregnancy Childbirth.* 2012;12:160.
9. Nelson-Piercy C. *Handbook of obstetric medicine.* Fifth edition. ed. Boca Raton: CRC Press, Taylor & Francis Group; 2015.
10. Rayanagoudar G, Hashi AA, Zamora J, Khan KS, Hitman GA, Thangaratinam S. Quantification of the type 2 diabetes risk in women with gestational diabetes: a systematic review and meta-analysis of 95,750 women. *Diabetologia.* 2016;59(7):1403-1411.
11. Nasiri-Amiri F, Bakhtiari A, Faramarzi M, Adib Rad H, Pasha H. The Association Between Physical Activity During Pregnancy and Gestational Diabetes Mellitus: A Case-Control Study. *Int J Endocrinol Metab.* 2016;14(3):e37123.
12. Tobias DK, Zhang C, van Dam RM, Bowers K, Hu FB. Physical activity before and during pregnancy and risk of gestational diabetes mellitus: a meta-analysis. *Diabetes Care.* 2011;34(1):223-229.
13. Dempsey JC, Sorensen TK, Williams MA, et al. Prospective study of gestational diabetes mellitus risk in relation to maternal recreational physical activity before and during pregnancy. *Am J Epidemiol.* 2004;159(7):663-670.
14. Dempsey JC, Butler CL, Sorensen TK, et al. A case-control study of maternal recreational physical activity and risk of gestational diabetes mellitus. *Diabetes Res Clin Pract.* 2004;66(2):203-215.
15. Oken E, Ning Y, Rifas-Shiman SL, Radesky JS, Rich-Edwards JW, Gillman MW. Associations of physical activity and inactivity before and during pregnancy with glucose tolerance. *Obstet Gynecol.* 2006;108(5):1200-1207.
16. Chasan-Taber L, Schmidt MD, Pekow P, et al. Physical activity and gestational diabetes mellitus among Hispanic women. *Journal of women's health (2002).* 2008;17(6):999-1008.
17. Marcoux S, Brisson J, Fabia J. The effect of leisure time physical activity on the risk of pre-eclampsia and gestational hypertension. *J Epidemiol Community Health.* 1989;43(2):147-152.
18. Vollebregt KC, Wolf H, Boer K, van der Wal MF, Vrijkotte TG, Bonsel GJ. Does physical activity in leisure time early in pregnancy reduce the incidence of

- 1  
2  
3 preeclampsia or gestational hypertension? *Acta Obstet Gynecol Scand*.  
4 2010;89(2):261-267.
- 5 19. Spracklen CN, Ryckman KK, Triche EW, Saftlas AF. Physical Activity During  
6 Pregnancy and Subsequent Risk of Preeclampsia and Gestational Hypertension: A  
7 Case Control Study. *Matern Child Health J*. 2016;20(6):1193-1202.
- 8 20. Saftlas AF, Logsden-Sackett N, Wang W, Woolson R, Bracken MB. Work, leisure-  
9 time physical activity, and risk of preeclampsia and gestational hypertension. *Am J*  
10 *Epidemiol*. 2004;160(8):758-765.
- 11 21. Richardsen KR, Mdala I, Berntsen S, et al. Objectively recorded physical activity in  
12 pregnancy and postpartum in a multi-ethnic cohort: association with access to  
13 recreational areas in the neighbourhood. *The international journal of behavioral*  
14 *nutrition and physical activity*. 2016;13:78.
- 15 22. Morkrid K, Jenum AK, Berntsen S, et al. Objectively recorded physical activity and  
16 the association with gestational diabetes. *Scand J Med Sci Sports*. 2014;24(5):e389-  
17 397.
- 18 23. Zhang Y, Dong S, Zuo J, Hu X, Zhang H, Zhao Y. Physical activity level of urban  
19 pregnant women in Tianjin, China: a cross-sectional study. *PLoS One*.  
20 2014;9(10):e109624.
- 21 24. Guelfi KJ, Wang C, Dimmock JA, Jackson B, Newnham JP, Yang H. A comparison  
22 of beliefs about exercise during pregnancy between Chinese and Australian pregnant  
23 women. *BMC Pregnancy Childbirth*. 2015;15:345.
- 24 25. Padmapriya N, Shen L, Soh SE, et al. Physical Activity and Sedentary Behavior  
25 Patterns Before and During Pregnancy in a Multi-ethnic Sample of Asian Women in  
26 Singapore. *Matern Child Health J*. 2015;19(11):2523-2535.
- 27 26. Padmapriya N, Bernard JY, Liang S, et al. Associations of physical activity and  
28 sedentary behavior during pregnancy with gestational diabetes mellitus among Asian  
29 women in Singapore. *BMC Pregnancy Childbirth*. 2017;17(1):364.
- 30 27. Strath SJ, Kaminsky LA, Ainsworth BE, et al. Guide to the assessment of physical  
31 activity: Clinical and research applications: a scientific statement from the American  
32 Heart Association. *Circulation*. 2013;128(20):2259-2279.
- 33 28. Harrison CL, Thompson RG, Teede HJ, Lombard CB. Measuring physical activity  
34 during pregnancy. *The international journal of behavioral nutrition and physical*  
35 *activity*. 2011;8:19.
- 36 29. Evenson KR, Goto MM, Furberg RD. Systematic review of the validity and reliability  
37 of consumer-wearable activity trackers. *The international journal of behavioral*  
38 *nutrition and physical activity*. 2015;12:159.
- 39 30. Lee JM, Kim Y, Welk GJ. Validity of consumer-based physical activity monitors.  
40 *Medicine and science in sports and exercise*. 2014;46(9):1840-1848.
- 41 31. Ferguson T, Rowlands AV, Olds T, Maher C. The validity of consumer-level, activity  
42 monitors in healthy adults worn in free-living conditions: a cross-sectional study. *The*  
43 *international journal of behavioral nutrition and physical activity*. 2015;12:42.
- 44 32. Cheatham SW, Stull KR, Fantigrassi M, Motel I. The efficacy of wearable activity  
45 tracking technology as part of a weight loss program: a systematic review. *J Sports*  
46 *Med Phys Fitness*. 2018;58(4):534-548.
- 47 33. Tudor-Locke C, Hatano Y, Pangrazi RP, Kang M. Revisiting "how many steps are  
48 enough?". *Medicine and science in sports and exercise*. 2008;40(7 Suppl):S537-543.
- 49 34. Tudor-Locke C, Johnson WD, Katzmarzyk PT. Relationship between accelerometer-  
50 determined steps/day and other accelerometer outputs in US adults. *Journal of*  
51 *physical activity & health*. 2011;8(3):410-419.
- 52  
53  
54  
55  
56  
57  
58  
59  
60



- 1  
2  
3 35. Diaz KM, Krupka DJ, Chang MJ, et al. Fitbit(R): An accurate and reliable device for  
4 wireless physical activity tracking. *Int J Cardiol.* 2015;185:138-140.  
5 36. de Seymour J, Chia A, Colega M, et al. Maternal Dietary Patterns and Gestational  
6 Diabetes Mellitus in a Multi-Ethnic Asian Cohort: The GUSTO Study. *Nutrients.*  
7 2016;8(9).  
8 37. International Association of Diabetes Pregnancy Study Groups Consensus Panel,  
9 Metzger BE, Gabbe SG, et al. International association of diabetes and pregnancy  
10 study groups recommendations on the diagnosis and classification of hyperglycemia  
11 in pregnancy. *Diabetes Care.* 2010;33(3):676-682.  
12 38. American College of Obstetricians Gynecologists Task Force on Hypertension in  
13 Pregnancy. Hypertension in pregnancy. Report of the American College of  
14 Obstetricians and Gynecologists' Task Force on Hypertension in Pregnancy. *Obstet*  
15 *Gynecol.* 2013;122(5):1122-1131.  
16 39. International Physical Activity Questionnaire.  
17 [https://sites.google.com/site/theipaq/questionnaire\\_links](https://sites.google.com/site/theipaq/questionnaire_links).  
18 40. Craig CL, Marshall AL, Sjoström M, et al. International physical activity  
19 questionnaire: 12-country reliability and validity. *Medicine and science in sports and*  
20 *exercise.* 2003;35(8):1381-1395.  
21 41. Macfarlane D, Chan A, Cerin E. Examining the validity and reliability of the Chinese  
22 version of the International Physical Activity Questionnaire, long form (IPAQ-LC).  
23 *Public Health Nutr.* 2011;14(3):443-450.  
24 42. Kinnunen TI, Pasanen M, Aittasalo M, et al. Preventing excessive weight gain during  
25 pregnancy - a controlled trial in primary health care. *Eur J Clin Nutr.* 2007;61(7):884-  
26 891.  
27 43. Jette M, Sidney K, Blumchen G. Metabolic equivalents (METs) in exercise testing,  
28 exercise prescription, and evaluation of functional capacity. *Clin Cardiol.*  
29 1990;13(8):555-565.  
30  
31  
32  
33  
34  
35  
36  
37  
38  
39  
40  
41  
42  
43  
44  
45  
46  
47  
48  
49  
50  
51  
52

### Author statement

MC was involved in all aspects of the study from conception, design, recruitment and manuscript writing. KHT and SBA provided critical review of the design and writing. As

1  
2  
3 Principle Investigator, SBA takes overall responsibility for the work. All authors agree to be  
4 accountable for their work.  
5  
6

7  
8 Funding statement

9 This work is supported by the AM-ETHOS Duke-NUS Medical Student Fellowship (AM-  
10 ETHOS01/FY2017/01-A01). In addition, the primary author is supported by the Integrated  
11 Platform for Research in Advancing Metabolic Health Outcomes in Women and Children  
12 (IPRAMHO).  
13  
14

15  
16 Conflict of interests

17 The authors declare no potential conflicts of interest with respect to the authorship and/or  
18 publication of this article.  
19  
20

21  
22 Word Count: 2178  
23  
24  
25  
26  
27  
28  
29  
30  
31  
32  
33  
34  
35  
36  
37  
38  
39  
40  
41  
42  
43  
44  
45  
46  
47  
48  
49  
50  
51  
52  
53  
54  
55  
56  
57

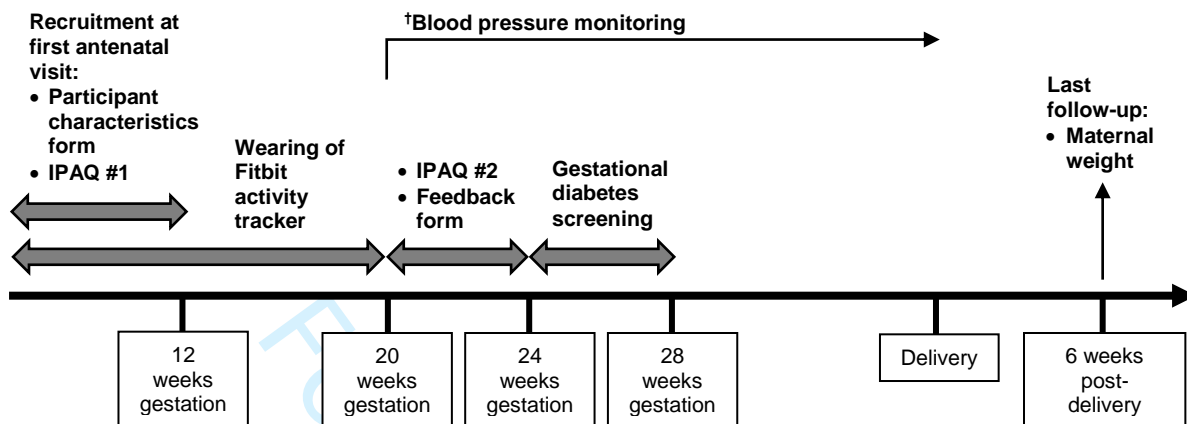

†Participants will continue to attend routine antenatal visits throughout the study period during which blood pressure monitoring will be done

Peer review only

# BMJ Open

## I-ACT: Integrated study on effect of Activity on Complications in pregnancy – study protocol of a multi-ethnic prospective cohort study

|                                 |                                                                                                                                                                                                               |
|---------------------------------|---------------------------------------------------------------------------------------------------------------------------------------------------------------------------------------------------------------|
| Journal:                        | <i>BMJ Open</i>                                                                                                                                                                                               |
| Manuscript ID                   | bmjopen-2018-025970.R1                                                                                                                                                                                        |
| Article Type:                   | Protocol                                                                                                                                                                                                      |
| Date Submitted by the Author:   | 24-Dec-2018                                                                                                                                                                                                   |
| Complete List of Authors:       | Cai, Meijin; Duke-NUS Medical School, Tan, Kok Hian; KK Women's and Children's Hospital, Division of Obstetrics and Gyneacology<br>Ang, Seng Bin; KK Women's and Children's Hospital, Family Medicine Service |
| <b>Primary Subject Heading</b>: | Obstetrics and gynaecology                                                                                                                                                                                    |
| Secondary Subject Heading:      | General practice / Family practice, Diabetes and endocrinology                                                                                                                                                |
| Keywords:                       | Diabetes in pregnancy < DIABETES & ENDOCRINOLOGY, Maternal medicine < OBSTETRICS, PREVENTIVE MEDICINE, PRIMARY CARE                                                                                           |
|                                 |                                                                                                                                                                                                               |

SCHOLARONE™  
Manuscripts

1  
2  
3 **1** **MANUSCRIPT TITLE:**  
4  
5  
6  
7 **2**  
8  
9

10 **3** I-ACT: Integrated study on effect of Activity on ComplicaTions in  
11  
12  
13 **4** pregnancy – study protocol of a multi-ethnic prospective cohort study  
14  
15  
16  
17 **5**  
18 **6**

19 **7** Meijin Cai, BSc Hons<sup>1,a</sup>; Kok Hian Tan, MBBS<sup>2,b</sup>; and Seng Bin Ang,  
20 **8** MBBS<sup>1,3,4,5,c</sup>.  
21  
22 **9**  
23 **10**  
24 **11**

25 **12** <sup>1</sup>Duke-NUS Medical School, Singapore, Singapore  
26

27 **13** <sup>2</sup>Department of Maternal Fetal Medicine, KK Women's and Children's Hospital,  
28 **14** Singapore, Singapore

29 **15** <sup>3</sup>Lee Kong Chian School of Medicine, Nanyang Technological University, Singapore,  
30 **16** Singapore

31 **17** <sup>4</sup>Yong Loo Lin School of Medicine, National University of Singapore, Singapore  
32

33 **18** <sup>5</sup>Family Medicine Service, KK Women's and Children's Hospital, Singapore,  
34 **19** Singapore  
35  
36  
37 **20**  
38 **21**  
39 **22**

40 **23** Email:

41 **24** <sup>a</sup>[caimeijin8@gmail.com](mailto:caimeijin8@gmail.com); <sup>e</sup>[e0008507@u.duke.nus.edu](mailto:e0008507@u.duke.nus.edu)

42 **25** <sup>b</sup>[tan.kok.hian@singhealth.com.sg](mailto:tan.kok.hian@singhealth.com.sg)

43 **26** <sup>c</sup>[ang.seng.bin@singhealth.com.sg](mailto:ang.seng.bin@singhealth.com.sg)  
44 **27**  
45  
46

47 **28** \*Corresponding author:

48 **29** Dr. Ang Seng Bin (MBBS)

49 **30** Head and Consultant

50 **31** Family Medicine Service

51 **32** KK Women's and Children's Hospital

52 **33** 100 Bukit Timah Road

53 **34** Singapore 229899

54 **35** Phone: +65 63941102

55 **36** Email: [ang.seng.bin@singhealth.com.sg](mailto:ang.seng.bin@singhealth.com.sg)  
56  
57  
58  
59 **37**  
60

1  
2  
3 38 Abstract  
4

5 39 **Introduction:** Physical activity (PA) during first 20 weeks of pregnancy may lower risks of  
6 40 gestational diabetes mellitus (GDM) and gestational hypertension (GH), though evidence of  
7 41 association remains inconclusive. Current studies rely heavily on subjective assessment of PA  
8 42 levels. Wearable activity trackers provide a convenient and objective surrogate index for PA  
9 43 validated by evidence-based steps/day categorization along a physical inactivity/activity  
10 44 continuum. I-ACT primarily aims to examine objectively measured PA levels and patterns in  
11 45 first and second trimesters of pregnancy and the association with GDM and/or GH in  
12 46 Singapore, a multi-ethnic Asian population. Secondary aims include investigating the bio-  
13 47 socio-demographic factors associated with sedentary behavior, and association of early  
14 48 pregnancy PA level with maternal weight at 6 weeks post-delivery. Results may facilitate  
15 49 identification of high-risk mothers-to-be and formulation of interventional strategies.  
16  
17  
18 50

19 51 **Methods and analysis:** Prospective cohort study that will recruit 408 women at first  
20 52 antenatal visit at <12 weeks gestation. Baseline bio-socio-demographic factors and PA levels  
21 53 assessed by participant characteristics form and the International Physical Activity  
22 54 Questionnaire (IPAQ) respectively. An activity tracker (Fitbit) will be provided to be worn  
23 55 daily from date of recruitment to end of 20 weeks gestation. Tracker-recorded data will be  
24 56 synchronized with an application on participant's smartphone. Compliance will be reinforced  
25 57 with fortnightly reminders. After 20 weeks, a second IPAQ and a feedback form will be  
26 58 administered. GDM screened at 24-28 weeks gestation. GH diagnosed after 20 weeks  
27 59 gestation. Maternal weight assessed at 6 weeks post-delivery. Appropriate statistical tests will  
28 60 be used to compare continuous and categorical PA measurements between first and second  
29 61 trimesters. Logistic regression will be used to analyse associations.  
30  
31  
32 62

33 63 **Ethics and dissemination:** Ethical approval obtained from the Centralised Institutional  
34 64 Review Board of SingHealth (reference 2017/2836). Dissemination of results will be via  
35 65 peer-reviewed research publications both online and in print, conference presentations,  
36 66 posters, and medical forums.  
37  
38 67

39  
40 68 (299 words)  
41  
42 69

43  
44 70 **Keywords:** Physical activity, gestational diabetes mellitus, pregnancy-induced hypertension,  
45 71 pregnancy  
46  
47 72  
48  
49 73  
50  
51 74  
52  
53 75  
54  
55 76  
56  
57 77  
58  
59 78  
60

1  
2  
3  
4  
5  
6  
7  
8  
9  
10  
11  
12  
13  
14  
15  
16  
17  
18  
19  
20  
21  
22  
23  
24  
25  
26  
27  
28  
29  
30  
31  
32  
33  
34  
35  
36  
37  
38  
39  
40  
41  
42  
43  
44  
45  
46  
47  
48  
49  
50  
51  
52  
53  
54  
55  
56  
57  
58  
59  
60

79 Article summary

80 **Strengths and limitations of this study**

- 81 • Prospective cohort study of a multi-ethnic Asian population
- 82 • Objective measurement of PA levels and patterns in early pregnancy
- 83 • Data collection designed to minimize recall bias
- 84 • Participant non-compliance despite reinforcement measures
- 85 • Participants' unfamiliarity with wearable activity tracker and mobile application
- 86 despite education at recruitment

For peer review only

## 111 Introduction

112 Physical activity (PA) is defined as any bodily movement produced by skeletal muscles that  
113 results in energy expenditure<sup>1</sup>. Current recommendations encourage women with  
114 uncomplicated pregnancies to continue or initiate safe physical activities in pregnancy<sup>2</sup>. More  
115 specifically, the CDC recommends 30 min/day for five days each week of moderate-intensity  
116 aerobic activity, which can be met by walking<sup>3</sup>. Concerns about safety have been refuted by  
117 literature demonstrating that moderate exercise in low-risk pregnancy improves maternal  
118 well-being without associated risks of birth weight reduction or preterm birth<sup>4</sup>.

119 Physical inactivity or sedentary behavior in early pregnancy (<20 weeks gestation) is a  
120 potential modifiable risk factor for two common obstetric complications, gestational diabetes  
121 mellitus (GDM) and gestational hypertension (GH). GDM is defined as carbohydrate  
122 intolerance that develops during pregnancy<sup>5</sup>. It complicates 1.8-25.1% of pregnancies  
123 worldwide depending on country and definition, with South-East Asia having the second  
124 highest prevalence at 8.1-18.3<sup>6</sup>. Approximately 8-20% of pregnancies are affected in  
125 Singapore<sup>7</sup>. Overall prevalence of GH, otherwise known as pregnancy-induced hypertension,  
126 is estimated at 10-12%<sup>8,9</sup>, though the local incidence has not been established. Perinatal  
127 sequelae of GDM and GH include macrosomia, neonatal hypoglycemia, preterm birth,  
128 intrauterine growth restriction (IUGR), and low APGAR scores. Both metabolic disorders are  
129 also proven risk factors of future type 2 diabetes<sup>10</sup>.

130 Current literature investigating the association between PA in early pregnancy and the  
131 development of GDM has shown a significant risk reduction of up to 24%<sup>11-14</sup>, though a few  
132 other studies have found a null association or insufficient evidence<sup>15-17</sup>. The association with  
133 GH is even less clear from the limited literature available<sup>18-21</sup>. All these studies utilised  
134 questionnaires as a measurement of PA. Studies that incorporate an objective means of  
135 measurement have been scarce<sup>22,23</sup>, which may partially explain the inconclusive evidence of  
136 association thus far. A Norway-based study investigating objectively recorded PA in early  
137 pregnancy and GDM reported that the adjusted odds ratio for GDM decreased 19% with  
138 every 3159 step-increase per day<sup>22</sup>. Based on these existing studies, physical inactivity in  
139 early pregnancy is a modifiable risk factor worth targeting

140 This is especially so in the Asian population. PA during first half of pregnancy has been  
141 shown to be low in an Asian urban setting<sup>24</sup>, and similarly lower when compared to non-  
142 Asian counterparts<sup>23,25</sup>. In Singapore, no published study on objectively measured PA levels  
143 in pregnancy could be found, and studies on association of subjectively-measured early  
144 pregnancy PA levels with both obstetric complications are rare. Padmapriya *et al.*  
145 investigated the change in PA levels from a pre-pregnancy to pregnancy state using a  
146 structured self-constructed questionnaire administered at 26-28 weeks gestation scored based  
147 on the International Physical Activity Questionnaire (IPAQ) short form<sup>26</sup>. The same study  
148 group further reported that a higher PA during the first 6 months of pregnancy was associated  
149 with lower prevalence of GDM, especially among overweight/obese women<sup>27</sup>. However, the  
150 utilisation of a questionnaire at 26-28 weeks gestation that relied on recall of PA levels  
151 during first 6 months of pregnancy and the year before subjected the results to a high level of  
152 recall bias. Therefore, the paucity of local research on objectively-measured PA levels in  
153 early pregnancy and association with obstetric metabolic outcomes warrants additional  
154 prospective studies.



1  
2  
3 155 As evident from existing studies, current assessment of pregnancy PA levels relies heavily on  
4 156 subjective, self-reporting questionnaires deemed to be the most feasible method with the  
5 157 absence of a gold standard and clear guidelines<sup>28</sup>. The inclusion of more objective  
6 158 measurements is being advocated<sup>29</sup>. Consumer wearable activity trackers operate through a 3-  
7 159 axis accelerometer, providing an alternative convenient and objective means of assessing PA  
8 160 levels during pregnancy. The accuracy, reliability and efficacy of wearable activity trackers  
9 161 in various health programs have been validated<sup>30-33</sup>, although a systematic review has found  
10 162 the research-grade accelerometer or pedometer to be superior in terms of accuracy<sup>34</sup>. Steps  
11 163 per day categorization along a physical inactivity/activity continuum based on CDC  
12 164 recommendation has also been elucidated, with 5000 (sedentary) and 10,000 (active) being  
13 165 the primary anchor points<sup>35</sup>. The correlation between steps per day and activity counts per  
14 166 day, from which activity intensity and duration were derived, was proven to be positive and  
15 167 strong, thus validating its use as an index for PA<sup>36</sup>. Step count estimated by Fitbit activity  
16 168 trackers among healthy adults has also been validated in a separate study<sup>37</sup>. Furthermore,  
17 169 various measured parameters such as step count and moderate-to-vigorous PA (MVPA) of  
18 170 different Fitbit activity trackers models have also been validated in the particular population  
19 171 of pregnant women in free living conditions<sup>38</sup>.

20  
21  
22  
23  
24  
25 172 Through the use of both Fitbit activity trackers and the IPAQ, this prospective multi-ethnic  
26 173 cohort study primarily aims to investigate the PA levels and patterns in early pregnancy (1st  
27 174 trimester and 2nd trimester up to 20 weeks gestation), as well as the effect of PA in early  
28 175 pregnancy on development of GDM and/or GH. Secondary aims include assessing the bio-  
29 176 socio-demographic factors associated with sedentary behavior, and examining the association  
30 177 between early pregnancy PA level and maternal weight at 6 weeks post-delivery.

31  
32  
33 178

34  
35 179

36  
37 180

38  
39 181

40  
41 182

42  
43 183

44  
45 184

46  
47 185

48  
49 186

50  
51 187

52  
53 188

54  
55 189

56  
57 190

58  
59 191

60 192

1  
2  
3 193 Methods and analysis  
4

5 194 **Study design**  
6

7 195 In this prospective cohort study, pregnant women will be recruited at outpatient clinics in KK  
8 196 Women's and Children's Hospital, a major public hospital in Singapore that sees a high  
9 197 volume of obstetrics & gynaecology consultations. Recruitment started in June 2018 and is  
10 198 expected to end in 2019. This study will follow the Strengthening the Reporting of  
11 199 Observational Studies in Epidemiology (STROBE) reporting guideline for cohort studies.  
12

13  
14 200

15  
16 201 **Recruitment and eligibility criteria**  
17

18 202 All obstetricians running outpatient general obstetrics & gynaecology clinics will refer  
19 203 suitable candidates for recruitment. All recruitment will be done via face-to-face contact by  
20 204 the research team.

21  
22 205 Inclusion criteria are singleton pregnancy, first antenatal visit less than 12 weeks gestation,  
23 206 and ages between 21 and 50 years old inclusive. Exclusion criteria are severe medical and/or  
24 207 psychological co-morbidity (including New York Heart Association (NYHA) class IV heart  
25 208 failure, end-stage renal disease, assistive device-dependent for mobility, cognitive  
26 209 impairment, and loss of rational thinking), and skin conditions (including contact dermatitis,  
27 210 pemphigus vulgaris and bullous pemphigoid) precluding the wearing of activity trackers.  
28  
29

30 211

31  
32 212 **Power analysis**  
33

34 213 Given that prevalence of GH has not been investigated in Singapore, GDM prevalence is  
35 214 used instead. Assuming that GDM proportion is 17.6%<sup>39</sup> and that PA can reduce risk of  
36 215 GDM by 30%, a sample of 367 mothers will be required at 80% power and 5% level of  
37 216 significance. Assuming a dropout rate of 10%, a sample of 408 mothers will be recruited into  
38 217 the study.  
39

40  
41 218

42  
43 219 **Participant timeline**  
44

45 220 Recruitment is at first antenatal visit less than 12 weeks gestation, during which Fitbit  
46 221 education, International Physical Activity Questionnaire (IPAQ) and participant  
47 222 characteristics form are done (Fig. 1). PA level monitoring occurs henceforth until end of 20  
48 223 weeks gestation inclusive. The standard 4-weekly antenatal visits will continue during this  
49 224 period. After 20 weeks gestation, a second IPAQ and a feedback form are administered either  
50 225 at regular antenatal visits before 24 weeks gestation, or over the phone/email. Routine GDM  
51 226 screening takes place between 24 and 28 weeks gestation. The final follow-up occurs at the  
52 227 6th week after delivery to obtain participants' weight.  
53

54  
55 228

56  
57 229 **Ensuring compliance**  
58  
59  
60

230 Approaches to enhance compliance include reinforcing the importance of commitment to  
231 wearing the activity trackers daily at the time of recruitment, and making fortnightly follow-  
232 up calls up until 20 weeks gestation. Compliance will also be recorded as part of Fitbit use  
233 assessment in the participant feedback form at the end of 20 weeks gestation.

234

## 235 **Outcome measures**

236 Primary outcomes include the following:

- 237 · GDM – diagnosed if the following threshold value at any time point is exceeded after  
238 a 75 g oral glucose tolerance test (OGTT) between 24 and 28 weeks gestation based  
239 on the International Association of Diabetes and Pregnancy Study Groups (IADPSG)  
240 criteria: fasting venous plasma glucose of  $\geq 5.1$  mmol/L, 1-hour venous plasma  
241 glucose of  $\geq 10.0$  mmol/L, and 2-hour venous plasma glucose  $\geq 8.5$  mmol/L<sup>40</sup>.
- 242 · GH – diagnosed as new onset hypertension (systolic blood pressure  $\geq 140$  mmHg  
243 and/or diastolic blood pressure  $\geq 90$  mmHg) measured on two occasions at least four  
244 hours apart after 20 weeks gestation in the absence of proteinuria or new signs of end-  
245 organ dysfunction<sup>41</sup>.

246 Secondary outcomes include the following:

- 247 · Weight at 6 weeks post-delivery
- 248 · Weight gain in pregnancy
- 249 · Intrauterine growth restriction (IUGR)
- 250 · Preterm birth (GA  $< 37$  weeks)
- 251 · Macrosomia (BW  $> 4.5$  kg)
- 252 · Neonatal hypoglycemia (glucose  $< 2.5$  mmol/L)
- 253 · Pre-eclampsia
- 254 · APGAR scores

255

## 256 **Data collection**

### 257 ***Research participant characteristics form***

258 Sociodemographic data to be assessed include marital status, educational level, household  
259 income, type of housing, working status during pregnancy, smoking status, and alcohol  
260 consumption. Medical history including pre-pregnancy height and weight, parity, history of  
261 infertility treatment, existing chronic illnesses, history of GDM and/or GH, family history of  
262 DM, and reasons behind potential PA restriction during early pregnancy will also be  
263 collected.

264

### 265 ***Fitbit activity tracker and mobile application***

266 At recruitment, each participant is given a wristband activity tracker (Fitbit) that will be  
267 connected via Bluetooth to a Fitbit application downloaded onto her smartphone. Education  
268 on device and application will be carried out. The tracker is worn daily from recruitment to

269 end of 20 weeks gestation inclusive, except during bathing or water activities. Participants are  
270 advised to synchronize the tracker data at least once a week. For data to be valid, wear-time  
271 must be at least 4 days per week (including one weekend day) and at least 10 hours per day.

272 Steps per day will be recorded by the tracker. Data will be reported as continuous and  
273 categorical variables. Continuous variables include mean weekday and weekend steps per day  
274 and mean steps per day in first and second trimesters. Categorical variables include  
275 classification into a CDC recommendation-based steps per day physical inactivity/activity  
276 continuum defined as follows: (1) <5000 (sedentary); (2) 5000-7499 (low active); (3) 7500-  
277 9999 (somewhat active); (4) 10,000-12,499 (active); and (5)  $\geq 12,500$  (highly active)<sup>35</sup>.

278

### 279 ***International Physical Activity Questionnaire (IPAQ)***

280 The IPAQ long version will be self-administered during the first visit at less than 12 weeks  
281 gestation in the first trimester and again between 20-24 weeks gestation in the second  
282 trimester. It is a set of 4 questionnaires assessing 5 activity domains (occupation,  
283 transportation, household, leisure, and sedentary) independently in the past 7 days, and may  
284 be administered via self or telephone<sup>42</sup>. Well-established and validated in adults aged 15-69  
285 years, it is available in both English and Chinese<sup>43,44</sup>. It has been used in studies involving  
286 pregnant women<sup>29,45</sup>.

287 Data will be reported as continuous and categorical variables. Continuous variables include  
288 median MET-minutes per week (MET-min/wk) and interquartile ranges computed for each  
289 domain, subdomain (walking, moderate-intensity PA and vigorous-intensity PA) and overall  
290 total PA. MET or metabolic equivalent is a unit that measures energy expenditure in  
291 multiples of the resting metabolic rate<sup>46</sup>. Categorical variables include classification into low,  
292 moderate, high levels of PA according to the IPAQ scoring protocol.

293

### 294 ***Medical record data***

295 Additional data to be collected include ethnicity, weight changes during pregnancy, weight at  
296 6 weeks post-delivery, obstetric outcomes of GDM, GH, preeclampsia and IUGR, and  
297 neonatal outcomes comprising APGAR scores, preterm birth, macrosomia, and neonatal  
298 hypoglycemia.

299

### 300 ***Participant feedback form***

301 After the end of 20 weeks gestation, experience with the activity tracker and mobile  
302 application in terms of usability and troubleshooting will be evaluated. Compliance level will  
303 be quantified by number of days per week.

304

### 305 **Statistics**

306 Descriptive statistics of PA levels in the 1st and early 2nd trimester will be presented.  
307 Categorical variables will be presented as n (%) while continuous variables will be presented

308 as mean (SD) or median (SD). Mean steps per day and median MET-minutes per week  
309 between semesters will be compared using paired Student's t-test and Wilcoxon signed-rank  
310 test respectively. McNemar's test will be used to compare sedentary behavior between  
311 semesters. Similar tests will be employed to assess for a difference in PA levels between  
312 weekdays and weekends.

313 Binary logistic regression will be used to evaluate the association of early pregnancy PA with  
314 GDM and/or GH. Crude (unadjusted) and adjusted regression models will be included.  
315 Potential confounders will be identified a priori based on literature review and controlled for  
316 in the regression analyses. Potential interactions between covariates and early pregnancy PA  
317 will be tested using cross-product terms. Secondary analyses on the bio-socio-demographic  
318 factors associated with sedentary behavior, as well as the association between early  
319 pregnancy PA level and maternal weight at 6 weeks post-delivery, will follow the methods of  
320 the primary analyses, but are exploratory having not been powered to formally test the  
321 hypotheses. All regression analyses will be presented as odds ratios (ORs) with 95%  
322 confidence intervals (CIs).

323 Statistical analyses will be performed using IBM SPSS Statistics version 23.0 (IBM Corp.,  
324 Armonk, N.Y., USA). *P* values of <0.05 will be considered statistically significant.

325

### 326 **Safety parameters**

327 Adverse effects and device monitoring will be carried out at the subsequent 4-weekly routine  
328 prenatal visits. Any adverse skin reaction to the wristband will be recorded. Participation will  
329 be stopped at any time the Principal Investigator decides that continuing on could be harmful  
330 to the participant.

331

### 332 **Data management**

333 All data will be coded for confidentiality. Hardcopy data will be stored at the research site  
334 under lock and key. Electronic data can only be accessed and retrieved from the secured  
335 website by the participant and research team. Electronic data will be exported on a fortnightly  
336 basis. All data obtained will be entered into and stored on the institution Research Electronic  
337 Data Capture (REDCap) system, a centralised secured data management server with  
338 password access. Data integrity monitoring will be carried out monthly by the principal  
339 investigator and co-investigators if deemed necessary.

340

### 341 **Patient and Public Involvement**

342 Patients and the public were not involved in the development of the research question and  
343 outcome measures.

344

345

346

1  
2  
3 347 Ethics and dissemination  
4

5 348 Ethical approval was obtained from the Centralised Institutional Review Board of SingHealth  
6 349 (reference 2017/2836). Informed written consent will be sought from all participants.  
7

8 350 Results from this study will be submitted to the funding organization and peer-reviewed  
9 351 journals for consideration of publication both online and in print. Results will also be  
10 352 presented at relevant meetings, conferences and medical forums in either oral or poster  
11 353 formats.  
12  
13

14 354

15 355

16 356

17 357

18 358

19 359

20 360

21 361

22 362

23 363

24 364

25 365

26 366

27 367

28 368

29 369

30 370

31 371

32 372

33 373

34 374

35 375

36 376

37 377

38 378

For peer review only

1  
2  
3 379 Conclusion  
4

5 380 The I-ACT study aims to be the first comprehensive study objectively evaluating the PA  
6 381 levels and patterns in early pregnancy, and their association with GDM and/or GH in the  
7 382 multi-ethnic population of Singapore. In addition to addressing these important scientific  
8 383 knowledge gaps, from a clinical perspective, the study itself may increase awareness of PA  
9 384 during early pregnancy while demonstrating the potential of wearable activity trackers as an  
10 385 objective measure of PA in health research. More importantly, we hope the results of the  
11 386 study facilitate the identification of high-risk mothers-to-be for targeted intervention, and  
12 387 help formulate strategies for interventional efforts.  
13  
14  
15  
16 388  
17  
18 389  
19  
20 390  
21 391  
22  
23 392  
24  
25 393  
26  
27 394  
28  
29 395  
30  
31 396  
32  
33 397  
34  
35 398  
36  
37 399  
38  
39 400  
40  
41 401  
42  
43 402  
44  
45 403  
46  
47 404  
48  
49 405  
50  
51 406  
52  
53 407  
54  
55 408  
56  
57 409  
58  
59 410  
60 411

For peer review only

1  
2  
3 412 Acknowledgements  
4

5 413 The authors would like to thank Professor Satvinder Singh Dhaliwal for providing statistical  
6 414 advice during the conception of this study.  
7

8 415  
9

10 416  
11

12 417  
13

14 418  
15

16 419  
17

18 420  
19

20 421  
21

22 422  
23

24 423  
25

26 424  
27

28 425  
29

30 426  
31

32 427  
33

34 428  
35

36 429  
37

38 430  
39

40 431  
41

42 432  
43

44 433  
45

46 434  
47

48 435  
49

50 436  
51

52 437  
53

54 438  
55

56 439  
57

58 440  
59

60 441  
60 442

For peer review only



443 References

- 444 1. Caspersen CJ, Powell KE, Christenson GM. Physical activity, exercise, and physical  
445 fitness: definitions and distinctions for health-related research. *Public Health Rep.*  
446 1985;100(2):126-131.
- 447 2. ACOG Committee Opinion No. 650: Physical Activity and Exercise During Pregnancy  
448 and the Postpartum Period. *Obstet Gynecol.* 2015;126(6):e135-142.
- 449 3. Centre for Disease Control and Prevention.  
450 <https://www.cdc.gov/physicalactivity/basics/pregnancy/index.htm>. Accessed 10 July,  
451 2017.
- 452 4. Nascimento SL, Surita FG, Cecatti JG. Physical exercise during pregnancy: a  
453 systematic review. *Current opinion in obstetrics & gynecology.* 2012;24(6):387-394.
- 454 5. Bulletins-Obstetrics CoP. ACOG Practice Bulletin No. 190: Gestational Diabetes  
455 Mellitus. *Obstet Gynecol.* 2018;131(2):e49-e64.
- 456 6. Zhu Y, Zhang C. Prevalence of Gestational Diabetes and Risk of Progression to Type  
457 2 Diabetes: a Global Perspective. *Curr Diab Rep.* 2016;16(1):7.
- 458 7. Yew TW, Khoo CM, Thai AC, Kale AS, Yong EL, Tai ES. The Prevalence of  
459 Gestational Diabetes Mellitus Among Asian Females is Lower Using the New 2013  
460 World Health Organization Diagnostic Criteria. *Endocr Pract.* 2014;20(10):1064-1069.
- 461 8. Lim WY, Saw SM, Tan KH, Yeo GS, Kwek KY. A cohort evaluation on arterial  
462 stiffness and hypertensive disorders in pregnancy. *BMC Pregnancy Childbirth.*  
463 2012;12:160.
- 464 9. Nelson-Piercy C. *Handbook of obstetric medicine.* Fifth edition. ed. Boca Raton: CRC  
465 Press, Taylor & Francis Group; 2015.
- 466 10. Rayanagoudar G, Hashi AA, Zamora J, Khan KS, Hitman GA, Thangaratinam S.  
467 Quantification of the type 2 diabetes risk in women with gestational diabetes: a  
468 systematic review and meta-analysis of 95,750 women. *Diabetologia.*  
469 2016;59(7):1403-1411.
- 470 11. Nasiri-Amiri F, Bakhtiari A, Faramarzi M, Adib Rad H, Pasha H. The Association  
471 Between Physical Activity During Pregnancy and Gestational Diabetes Mellitus: A  
472 Case-Control Study. *Int J Endocrinol Metab.* 2016;14(3):e37123.
- 473 12. Tobias DK, Zhang C, van Dam RM, Bowers K, Hu FB. Physical activity before and  
474 during pregnancy and risk of gestational diabetes mellitus: a meta-analysis. *Diabetes*  
475 *Care.* 2011;34(1):223-229.
- 476 13. Dempsey JC, Sorensen TK, Williams MA, et al. Prospective study of gestational  
477 diabetes mellitus risk in relation to maternal recreational physical activity before and  
478 during pregnancy. *Am J Epidemiol.* 2004;159(7):663-670.
- 479 14. Dempsey JC, Butler CL, Sorensen TK, et al. A case-control study of maternal  
480 recreational physical activity and risk of gestational diabetes mellitus. *Diabetes Res*  
481 *Clin Pract.* 2004;66(2):203-215.
- 482 15. Oken E, Ning Y, Rifas-Shiman SL, Radesky JS, Rich-Edwards JW, Gillman MW.  
483 Associations of physical activity and inactivity before and during pregnancy with  
484 glucose tolerance. *Obstet Gynecol.* 2006;108(5):1200-1207.
- 485 16. Chasan-Taber L, Schmidt MD, Pekow P, et al. Physical activity and gestational diabetes  
486 mellitus among Hispanic women. *Journal of women's health (2002).* 2008;17(6):999-  
487 1008.
- 488 17. Yin YN, Li XL, Tao TJ, Luo BR, Liao SJ. Physical activity during pregnancy and the  
489 risk of gestational diabetes mellitus: a systematic review and meta-analysis of  
490 randomised controlled trials. *Br J Sports Med.* 2014;48(4):290-295.

- 1  
2  
3 491 18. Marcoux S, Brisson J, Fabia J. The effect of leisure time physical activity on the risk of  
4 492 pre-eclampsia and gestational hypertension. *J Epidemiol Community Health*.  
5 493 1989;43(2):147-152.  
6 494 19. Vollebregt KC, Wolf H, Boer K, van der Wal MF, Vrijkotte TG, Bonsel GJ. Does  
7 495 physical activity in leisure time early in pregnancy reduce the incidence of preeclampsia  
8 496 or gestational hypertension? *Acta Obstet Gynecol Scand*. 2010;89(2):261-267.  
9 497 20. Spracklen CN, Ryckman KK, Triche EW, Saftlas AF. Physical Activity During  
10 498 Pregnancy and Subsequent Risk of Preeclampsia and Gestational Hypertension: A Case  
11 499 Control Study. *Matern Child Health J*. 2016;20(6):1193-1202.  
12 500 21. Saftlas AF, Logsdon-Sackett N, Wang W, Woolson R, Bracken MB. Work, leisure-  
13 501 time physical activity, and risk of preeclampsia and gestational hypertension. *Am J*  
14 502 *Epidemiol*. 2004;160(8):758-765.  
15 503 22. Richardsen KR, Mdala I, Berntsen S, et al. Objectively recorded physical activity in  
16 504 pregnancy and postpartum in a multi-ethnic cohort: association with access to  
17 505 recreational areas in the neighbourhood. *The international journal of behavioral*  
18 506 *nutrition and physical activity*. 2016;13:78.  
19 507 23. Morkrid K, Jennum AK, Berntsen S, et al. Objectively recorded physical activity and the  
20 508 association with gestational diabetes. *Scand J Med Sci Sports*. 2014;24(5):e389-397.  
21 509 24. Zhang Y, Dong S, Zuo J, Hu X, Zhang H, Zhao Y. Physical activity level of urban  
22 510 pregnant women in Tianjin, China: a cross-sectional study. *PLoS One*.  
23 511 2014;9(10):e109624.  
24 512 25. Guelfi KJ, Wang C, Dimmock JA, Jackson B, Newnham JP, Yang H. A comparison of  
25 513 beliefs about exercise during pregnancy between Chinese and Australian pregnant  
26 514 women. *BMC Pregnancy Childbirth*. 2015;15:345.  
27 515 26. Padmapriya N, Shen L, Soh SE, et al. Physical Activity and Sedentary Behavior  
28 516 Patterns Before and During Pregnancy in a Multi-ethnic Sample of Asian Women in  
29 517 Singapore. *Matern Child Health J*. 2015;19(11):2523-2535.  
30 518 27. Padmapriya N, Bernard JY, Liang S, et al. Associations of physical activity and  
31 519 sedentary behavior during pregnancy with gestational diabetes mellitus among Asian  
32 520 women in Singapore. *BMC Pregnancy Childbirth*. 2017;17(1):364.  
33 521 28. Strath SJ, Kaminsky LA, Ainsworth BE, et al. Guide to the assessment of physical  
34 522 activity: Clinical and research applications: a scientific statement from the American  
35 523 Heart Association. *Circulation*. 2013;128(20):2259-2279.  
36 524 29. Harrison CL, Thompson RG, Teede HJ, Lombard CB. Measuring physical activity  
37 525 during pregnancy. *The international journal of behavioral nutrition and physical*  
38 526 *activity*. 2011;8:19.  
39 527 30. Evenson KR, Goto MM, Furberg RD. Systematic review of the validity and reliability  
40 528 of consumer-wearable activity trackers. *The international journal of behavioral*  
41 529 *nutrition and physical activity*. 2015;12:159.  
42 530 31. Lee JM, Kim Y, Welk GJ. Validity of consumer-based physical activity monitors.  
43 531 *Medicine and science in sports and exercise*. 2014;46(9):1840-1848.  
44 532 32. Ferguson T, Rowlands AV, Olds T, Maher C. The validity of consumer-level, activity  
45 533 monitors in healthy adults worn in free-living conditions: a cross-sectional study. *The*  
46 534 *international journal of behavioral nutrition and physical activity*. 2015;12:42.  
47 535 33. Cheatham SW, Stull KR, Fantigrassi M, Motel I. The efficacy of wearable activity  
48 536 tracking technology as part of a weight loss program: a systematic review. *J Sports Med*  
49 537 *Phys Fitness*. 2018;58(4):534-548.  
50 538 34. Feehan LM, Geldman J, Sayre EC, et al. Accuracy of Fitbit Devices: Systematic  
51 539 Review and Narrative Syntheses of Quantitative Data. *JMIR Mhealth Uhealth*.  
52 540 2018;6(8):e10527.

- 1  
2  
3 541 35. Tudor-Locke C, Hatano Y, Pangrazi RP, Kang M. Revisiting "how many steps are  
4 542 enough?". *Medicine and science in sports and exercise*. 2008;40(7 Suppl):S537-543.  
5 543 36. Tudor-Locke C, Johnson WD, Katzmarzyk PT. Relationship between accelerometer-  
6 544 determined steps/day and other accelerometer outputs in US adults. *Journal of physical*  
7 545 *activity & health*. 2011;8(3):410-419.  
8 546 37. Diaz KM, Krupka DJ, Chang MJ, et al. Fitbit(R): An accurate and reliable device for  
9 547 wireless physical activity tracking. *Int J Cardiol*. 2015;185:138-140.  
10 548 38. St-Laurent A, Mony MM, Mathieu ME, Ruchat SM. Validation of the Fitbit Zip and  
11 549 Fitbit Flex with pregnant women in free-living conditions. *J Med Eng Technol*.  
12 550 2018;42(4):259-264.  
13 551 39. de Seymour J, Chia A, Colega M, et al. Maternal Dietary Patterns and Gestational  
14 552 Diabetes Mellitus in a Multi-Ethnic Asian Cohort: The GUSTO Study. *Nutrients*.  
15 553 2016;8(9).  
16 554 40. International Association of Diabetes Pregnancy Study Groups Consensus Panel,  
17 555 Metzger BE, Gabbe SG, et al. International association of diabetes and pregnancy study  
18 556 groups recommendations on the diagnosis and classification of hyperglycemia in  
19 557 pregnancy. *Diabetes Care*. 2010;33(3):676-682.  
20 558 41. American College of Obstetricians Gynecologists Task Force on Hypertension in  
21 559 Pregnancy. Hypertension in pregnancy. Report of the American College of  
22 560 Obstetricians and Gynecologists' Task Force on Hypertension in Pregnancy. *Obstet*  
23 561 *Gynecol*. 2013;122(5):1122-1131.  
24 562 42. International Physical Activity Questionnaire.  
25 563 [https://sites.google.com/site/theipaq/questionnaire\\_links](https://sites.google.com/site/theipaq/questionnaire_links).  
26 564 43. Craig CL, Marshall AL, Sjostrom M, et al. International physical activity questionnaire:  
27 565 12-country reliability and validity. *Medicine and science in sports and exercise*.  
28 566 2003;35(8):1381-1395.  
29 567 44. Macfarlane D, Chan A, Cerin E. Examining the validity and reliability of the Chinese  
30 568 version of the International Physical Activity Questionnaire, long form (IPAQ-LC).  
31 569 *Public Health Nutr*. 2011;14(3):443-450.  
32 570 45. Kinnunen TI, Pasanen M, Aittasalo M, et al. Preventing excessive weight gain during  
33 571 pregnancy - a controlled trial in primary health care. *Eur J Clin Nutr*. 2007;61(7):884-  
34 572 891.  
35 573 46. Jette M, Sidney K, Blumchen G. Metabolic equivalents (METS) in exercise testing,  
36 574 exercise prescription, and evaluation of functional capacity. *Clin Cardiol*.  
37 575 1990;13(8):555-565.

576

577

578

579

580

581

582

583

584

585

586

587

588

589

1  
2  
3 590 Author statement  
4

5 591 MC was involved in all aspects of the study from conception, design, recruitment and  
6 592 manuscript writing. KHT and SBA provided critical review of the design and writing. As  
7 593 Principle Investigator, SBA takes overall responsibility for the work. All authors agree to be  
8 594 accountable for their work.  
9

10  
11 595

12  
13 596 Funding statement

14 597 This work is supported by the AM-ETHOS Duke-NUS Medical Student Fellowship (AM-  
15 598 ETHOS01/FY2017/01-A01). In addition, the primary author is supported by the Integrated  
16 599 Platform for Research in Advancing Metabolic Health Outcomes in Women and Children  
17 600 (IPRAMHO).  
18  
19

20 601

21 602 Conflict of interests

22  
23 603 The authors declare no potential conflicts of interest with respect to the authorship and/or  
24 604 publication of this article.  
25  
26

27 605

28 606 Word Count: 2411

29  
30 607

31  
32 608 Figure Legend

33  
34 609 Figure 1. Timeline of the I-ACT prospective cohort study.

35 610 †Participants will continue to attend routine antenatal visits throughout the study period  
36 611 during which blood pressure monitoring will be done.  
37  
38

39 612

40 613

41 614

42 615

43 616

44 617

45 618

46 619

47 620

48 621

49 622

50 623

51 624

52 625

53 626

54 627

55 628

56 629

57 630  
58  
59  
60

1  
2  
3  
4  
5  
6  
7  
8  
9  
10  
11  
12  
13  
14  
15  
16  
17  
18  
19  
20  
21  
22  
23  
24  
25  
26  
27  
28  
29  
30  
31  
32  
33  
34  
35  
36  
37  
38  
39  
40  
41  
42  
43  
44  
45  
46  
47  
48  
49  
50  
51  
52  
53  
54  
55  
56  
57  
58  
59  
60

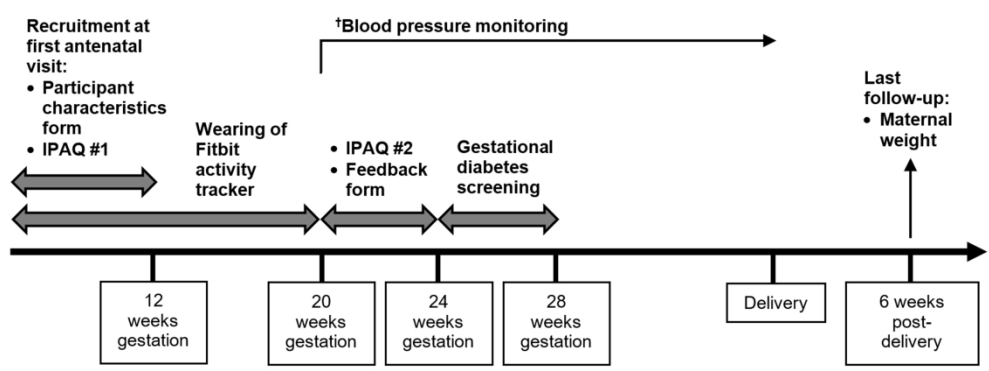

Figure 1. Timeline of the I-ACT prospective cohort study.  
 †Participants will continue to attend routine antenatal visits throughout the study period during which blood pressure monitoring will be done.

338x190mm (300 x 300 DPI)

# BMJ Open

## I-ACT: Integrated study on effect of Activity on ComplicaTions in pregnancy – study protocol of a multi-ethnic prospective cohort study

|                                 |                                                                                                                                                                                                               |
|---------------------------------|---------------------------------------------------------------------------------------------------------------------------------------------------------------------------------------------------------------|
| Journal:                        | <i>BMJ Open</i>                                                                                                                                                                                               |
| Manuscript ID                   | bmjopen-2018-025970.R2                                                                                                                                                                                        |
| Article Type:                   | Protocol                                                                                                                                                                                                      |
| Date Submitted by the Author:   | 18-Feb-2019                                                                                                                                                                                                   |
| Complete List of Authors:       | Cai, Meijin; Duke-NUS Medical School, Tan, Kok Hian; KK Women's and Children's Hospital, Division of Obstetrics and Gyneacology<br>Ang, Seng Bin; KK Women's and Children's Hospital, Family Medicine Service |
| <b>Primary Subject Heading</b>: | Obstetrics and gynaecology                                                                                                                                                                                    |
| Secondary Subject Heading:      | General practice / Family practice, Diabetes and endocrinology                                                                                                                                                |
| Keywords:                       | Diabetes in pregnancy < DIABETES & ENDOCRINOLOGY, Maternal medicine < OBSTETRICS, PREVENTIVE MEDICINE, PRIMARY CARE                                                                                           |
|                                 |                                                                                                                                                                                                               |

SCHOLARONE™  
Manuscripts

1  
2  
3 **1** **MANUSCRIPT TITLE:**  
4  
5  
6  
7 **2**  
8  
9

10 **3** I-ACT: Integrated study on effect of Activity on ComplicaTions in  
11  
12  
13 **4** pregnancy – study protocol of a multi-ethnic prospective cohort study  
14  
15  
16  
17 **5**  
18 **6**

19 **7** Meijin Cai, BSc Hons<sup>1,a</sup>; Kok Hian Tan, MBBS<sup>2,b</sup>; and Seng Bin Ang,  
20 **8** MBBS<sup>1,3,4,5,c</sup>.  
21  
22 **9**  
23 **10**  
24 **11**

25 **12** <sup>1</sup>Duke-NUS Medical School, Singapore, Singapore  
26

27 **13** <sup>2</sup>Department of Maternal Fetal Medicine, KK Women's and Children's Hospital,  
28 **14** Singapore, Singapore

29 **15** <sup>3</sup>Lee Kong Chian School of Medicine, Nanyang Technological University, Singapore,  
30 **16** Singapore

31 **17** <sup>4</sup>Yong Loo Lin School of Medicine, National University of Singapore, Singapore  
32

33 **18** <sup>5</sup>Family Medicine Service, KK Women's and Children's Hospital, Singapore,  
34 **19** Singapore  
35  
36  
37 **20**  
38 **21**  
39 **22**

40 **23** Email:

41 **24** <sup>a</sup>[caimeijin8@gmail.com](mailto:caimeijin8@gmail.com); <sup>e</sup>[e0008507@u.duke.nus.edu](mailto:e0008507@u.duke.nus.edu)

42 **25** <sup>b</sup>[tan.kok.hian@singhealth.com.sg](mailto:tan.kok.hian@singhealth.com.sg)

43 **26** <sup>c</sup>[ang.seng.bin@singhealth.com.sg](mailto:ang.seng.bin@singhealth.com.sg)  
44 **27**  
45  
46  
47 **28**

48 **29** \*Corresponding author:

49 **30** Dr. Ang Seng Bin (MBBS)

50 **31** Head and Consultant

51 **32** Family Medicine Service

52 **33** KK Women's and Children's Hospital

53 **34** 100 Bukit Timah Road

54 **35** Singapore 229899

55 **36** Phone: +65 63941102

56 **37** Email: [ang.seng.bin@singhealth.com.sg](mailto:ang.seng.bin@singhealth.com.sg)  
57  
58  
59  
60

1  
2  
3 38 Abstract  
4

5 39 **Introduction:** Physical activity (PA) during first 20 weeks of pregnancy may lower risks of  
6 40 gestational diabetes mellitus (GDM) and gestational hypertension (GH), though evidence of  
7 41 association remains inconclusive. Current studies rely heavily on subjective assessment of PA  
8 42 levels. Wearable activity trackers provide a convenient and objective surrogate index for PA  
9 43 validated by evidence-based steps/day categorization along a physical inactivity/activity  
10 44 continuum. I-ACT primarily aims to examine objectively measured PA levels and patterns in  
11 45 first and second trimesters of pregnancy and the association with GDM and/or GH in  
12 46 Singapore, a multi-ethnic Asian population. Secondary aims include investigating the bio-  
13 47 socio-demographic factors associated with sedentary behavior, and association of early  
14 48 pregnancy PA level with maternal weight at 6 weeks post-delivery. Results may facilitate  
15 49 identification of high-risk mothers-to-be and formulation of interventional strategies.  
16  
17  
18 50

19 51 **Methods and analysis:** Prospective cohort study that will recruit 408 women at first  
20 52 antenatal visit at <12 weeks gestation. Baseline bio-socio-demographic factors and PA levels  
21 53 assessed by participant characteristics form and the International Physical Activity  
22 54 Questionnaire (IPAQ) respectively. An activity tracker (Fitbit) will be provided to be worn  
23 55 daily from date of recruitment to end of 20 weeks gestation. Tracker-recorded data will be  
24 56 synchronized with an application on participant's smartphone. Compliance will be reinforced  
25 57 with fortnightly reminders. After 20 weeks, a second IPAQ and a feedback form will be  
26 58 administered. GDM screened at 24-28 weeks gestation. GH diagnosed after 20 weeks  
27 59 gestation. Maternal weight assessed at 6 weeks post-delivery. Appropriate statistical tests will  
28 60 be used to compare continuous and categorical PA measurements between first and second  
29 61 trimesters. Logistic regression will be used to analyse associations.  
30  
31  
32 62

33 63 **Ethics and dissemination:** Ethical approval obtained from the Centralised Institutional  
34 64 Review Board of SingHealth (reference 2017/2836). Dissemination of results will be via  
35 65 peer-reviewed research publications both online and in print, conference presentations,  
36 66 posters, and medical forums.  
37  
38 67

39  
40 68 (299 words)  
41  
42 69

43  
44 70 **Keywords:** Physical activity, gestational diabetes mellitus, pregnancy-induced hypertension,  
45 71 pregnancy  
46  
47 72  
48  
49 73  
50  
51 74  
52  
53 75  
54  
55 76  
56  
57 77  
58  
59 78  
60



1  
2  
3  
4  
5  
6  
7  
8  
9  
10  
11  
12  
13  
14  
15  
16  
17  
18  
19  
20  
21  
22  
23  
24  
25  
26  
27  
28  
29  
30  
31  
32  
33  
34  
35  
36  
37  
38  
39  
40  
41  
42  
43  
44  
45  
46  
47  
48  
49  
50  
51  
52  
53  
54  
55  
56  
57  
58  
59  
60

79 Article summary

80 **Strengths and limitations of this study**

- 81 • Prospective cohort study of a multi-ethnic Asian population
- 82 • Objective measurement of PA levels and patterns in early pregnancy
- 83 • Data collection designed to minimize recall bias
- 84 • Participant non-compliance despite reinforcement measures
- 85 • Participants' unfamiliarity with wearable activity tracker and mobile application
- 86 despite education at recruitment

For peer review only

## 111 Introduction

112 Physical activity (PA) is defined as any bodily movement produced by skeletal muscles that  
113 results in energy expenditure<sup>1</sup>. Current recommendations encourage women with  
114 uncomplicated pregnancies to continue or initiate safe physical activities in pregnancy<sup>2</sup>. More  
115 specifically, the CDC recommends 30 min/day for five days each week of moderate-intensity  
116 aerobic activity, which can be met by walking<sup>3</sup>. Concerns about safety have been refuted by  
117 literature demonstrating that moderate exercise in low-risk pregnancy improves maternal  
118 well-being without associated risks of birth weight reduction or preterm birth<sup>4</sup>.

119 Physical inactivity or sedentary behavior in early pregnancy (<20 weeks gestation) is a  
120 potential modifiable risk factor for two common obstetric complications, gestational diabetes  
121 mellitus (GDM) and gestational hypertension (GH). GDM is defined as carbohydrate  
122 intolerance that develops during pregnancy<sup>5</sup>. It complicates 1.8-25.1% of pregnancies  
123 worldwide depending on country and definition, with South-East Asia having the second  
124 highest prevalence at 8.1-18.3<sup>6</sup>. Approximately 8-20% of pregnancies are affected in  
125 Singapore<sup>7</sup>. Overall prevalence of GH, otherwise known as pregnancy-induced hypertension,  
126 is estimated at 10-12%<sup>8,9</sup>, though the local incidence has not been established. Perinatal  
127 sequelae of GDM and GH include macrosomia, neonatal hypoglycemia, preterm birth,  
128 intrauterine growth restriction (IUGR), and low APGAR scores. Both metabolic disorders are  
129 also proven risk factors of future type 2 diabetes<sup>10</sup>.

130 Current literature investigating the association between PA in early pregnancy and the  
131 development of GDM has shown a significant risk reduction of up to 24%<sup>11-14</sup>, though a few  
132 other studies have found a null association or insufficient evidence<sup>15-17</sup>. The association with  
133 GH is even less clear from the limited literature available<sup>18-21</sup>. All these studies utilised  
134 questionnaires as a measurement of PA. Studies that incorporate an objective means of  
135 measurement have been scarce<sup>22,23</sup>, which may partially explain the inconclusive evidence of  
136 association thus far. A Norway-based study investigating objectively recorded PA in early  
137 pregnancy and GDM reported that the adjusted odds ratio for GDM decreased 19% with  
138 every 3159 step-increase per day<sup>22</sup>. Based on these existing studies, physical inactivity in  
139 early pregnancy is a modifiable risk factor worth targeting

140 This is especially so in the Asian population. PA during first half of pregnancy has been  
141 shown to be low in an Asian urban setting<sup>24</sup>, and similarly lower when compared to non-  
142 Asian counterparts<sup>23,25</sup>. In Singapore, no published study on objectively measured PA levels  
143 in pregnancy could be found, and studies on association of subjectively-measured early  
144 pregnancy PA levels with both obstetric complications are rare. Padmapriya *et al.*  
145 investigated the change in PA levels from a pre-pregnancy to pregnancy state using a  
146 structured self-constructed questionnaire administered at 26-28 weeks gestation scored based  
147 on the International Physical Activity Questionnaire (IPAQ) short form<sup>26</sup>. The same study  
148 group further reported that a higher PA during the first 6 months of pregnancy was associated  
149 with lower prevalence of GDM, especially among overweight/obese women<sup>27</sup>. However, the  
150 utilisation of a questionnaire at 26-28 weeks gestation that relied on recall of PA levels  
151 during first 6 months of pregnancy and the year before subjected the results to a high level of  
152 recall bias. Therefore, the paucity of local research on objectively-measured PA levels in  
153 early pregnancy and association with obstetric metabolic outcomes warrants additional  
154 prospective studies.

1  
2  
3 155 As evident from existing studies, current assessment of pregnancy PA levels relies heavily on  
4 156 subjective, self-reporting questionnaires deemed to be the most feasible method with the  
5 157 absence of a gold standard and clear guidelines<sup>28</sup>. The inclusion of more objective  
6 158 measurements is being advocated<sup>29</sup>. Consumer wearable activity trackers operate through a 3-  
7 159 axis accelerometer, providing an alternative convenient and objective means of assessing PA  
8 160 levels during pregnancy. The accuracy, reliability and efficacy of wearable activity trackers  
9 161 in various health programs have been validated<sup>30-33</sup>, although a systematic review has found  
10 162 the research-grade accelerometer or pedometer to be superior in terms of accuracy<sup>34</sup>. Steps  
11 163 per day categorization along a physical inactivity/activity continuum based on CDC  
12 164 recommendation has also been elucidated, with 5000 (sedentary) and 10,000 (active) being  
13 165 the primary anchor points<sup>35</sup>. The correlation between steps per day and activity counts per  
14 166 day, from which activity intensity and duration were derived, was proven to be positive and  
15 167 strong, thus validating its use as an index for PA<sup>36</sup>. Step count estimated by Fitbit activity  
16 168 trackers among healthy adults has also been validated in a separate study<sup>37</sup>. Furthermore,  
17 169 various measured parameters such as step count and moderate-to-vigorous PA (MVPA) of  
18 170 different Fitbit activity trackers models have also been validated in the particular population  
19 171 of pregnant women in free living conditions<sup>38</sup>.

20  
21  
22  
23  
24  
25 172 Through the use of both Fitbit activity trackers and the IPAQ, this prospective multi-ethnic  
26 173 cohort study primarily aims to investigate the PA levels and patterns in early pregnancy (1st  
27 174 trimester and 2nd trimester up to 20 weeks gestation), as well as the effect of PA in early  
28 175 pregnancy on development of GDM and/or GH. Secondary aims include assessing the bio-  
29 176 socio-demographic factors associated with sedentary behavior, and examining the association  
30 177 between early pregnancy PA level and maternal weight at 6 weeks post-delivery.

31  
32  
33 178

34  
35 179

36  
37 180

38  
39 181

40  
41 182

42  
43 183

44  
45 184

46  
47 185

48  
49 186

50  
51 187

52  
53 188

54  
55 189

56  
57 190

58  
59 191

60 192

1  
2  
3 193 Methods and analysis  
4

5 194 **Study design**  
6

7 195 In this prospective cohort study, pregnant women will be recruited at outpatient clinics in KK  
8 196 Women's and Children's Hospital, a major public hospital in Singapore that sees a high  
9 197 volume of obstetrics & gynaecology consultations. Recruitment started in June 2018 and is  
10 198 expected to end in 2019. This study will follow the Strengthening the Reporting of  
11 199 Observational Studies in Epidemiology (STROBE) reporting guideline for cohort studies.  
12  
13

14 200

15  
16 201 **Recruitment and eligibility criteria**  
17

18 202 All obstetricians running outpatient general obstetrics & gynaecology clinics will refer  
19 203 suitable candidates for recruitment. All recruitment will be done via face-to-face contact by  
20 204 the research team.  
21

22 205 Inclusion criteria are singleton pregnancy, first antenatal visit less than 12 weeks gestation,  
23 206 and ages between 21 and 50 years old inclusive. Exclusion criteria are severe medical and/or  
24 207 psychological co-morbidity (including New York Heart Association (NYHA) class IV heart  
25 208 failure, end-stage renal disease, assistive device-dependent for mobility, cognitive  
26 209 impairment, and loss of rational thinking), and skin conditions (including contact dermatitis,  
27 210 pemphigus vulgaris and bullous pemphigoid) precluding the wearing of activity trackers.  
28  
29

30 211

31  
32 212 **Power analysis**  
33

34 213 Given that prevalence of GH has not been investigated in Singapore, GDM prevalence is  
35 214 used instead. Assuming that GDM proportion is 17.6%<sup>39</sup> and that PA can reduce risk of  
36 215 GDM by 30%, a sample of 367 mothers will be required at 80% power and 5% level of  
37 216 significance. Assuming a dropout rate of 10%, a sample of 408 mothers will be recruited into  
38 217 the study.  
39  
40

41 218

42  
43 219 **Participant timeline**  
44

45 220 Recruitment is at first antenatal visit less than 12 weeks gestation, during which Fitbit  
46 221 education, International Physical Activity Questionnaire (IPAQ) and participant  
47 222 characteristics form are done (Fig. 1). PA level monitoring occurs henceforth until end of 20  
48 223 weeks gestation inclusive. The standard 4-weekly antenatal visits will continue during this  
49 224 period. After 20 weeks gestation, a second IPAQ and a feedback form are administered either  
50 225 at regular antenatal visits before 24 weeks gestation, or over the phone/email. Routine GDM  
51 226 screening takes place between 24 and 28 weeks gestation. The final follow-up occurs at the  
52 227 6th week after delivery to obtain participants' weight.  
53  
54

55 228

56  
57 229 **Ensuring compliance**  
58  
59  
60

230 Approaches to enhance compliance include reinforcing the importance of commitment to  
231 wearing the activity trackers daily at the time of recruitment, and making fortnightly follow-  
232 up calls up until 20 weeks gestation. Compliance will also be recorded as part of Fitbit use  
233 assessment in the participant feedback form at the end of 20 weeks gestation.

234

## 235 **Outcome measures**

236 Primary outcomes include the following:

- 237 · GDM – diagnosed if the following threshold value at any time point is exceeded after  
238 a 75 g oral glucose tolerance test (OGTT) between 24 and 28 weeks gestation based  
239 on the International Association of Diabetes and Pregnancy Study Groups (IADPSG)  
240 criteria: fasting venous plasma glucose of  $\geq 5.1$  mmol/L, 1-hour venous plasma  
241 glucose of  $\geq 10.0$  mmol/L, and 2-hour venous plasma glucose  $\geq 8.5$  mmol/L<sup>40</sup>.
- 242 · GH – diagnosed as new onset hypertension (systolic blood pressure  $\geq 140$  mmHg  
243 and/or diastolic blood pressure  $\geq 90$  mmHg) measured on two occasions at least four  
244 hours apart after 20 weeks gestation in the absence of proteinuria or new signs of end-  
245 organ dysfunction<sup>41</sup>.

246 Secondary outcomes include the following:

- 247 · Weight at 6 weeks post-delivery
- 248 · Weight gain in pregnancy
- 249 · Intrauterine growth restriction (IUGR)
- 250 · Preterm birth (GA  $< 37$  weeks)
- 251 · Macrosomia (BW  $> 90$ th percentile or  $> 4.0$  kg)
- 252 · Neonatal hypoglycemia (glucose  $< 2.5$  mmol/L)
- 253 · Pre-eclampsia
- 254 · APGAR scores

255

## 256 **Data collection**

### 257 ***Research participant characteristics form***

258 Sociodemographic data to be assessed include marital status, educational level, household  
259 income, type of housing, working status during pregnancy, smoking status, and alcohol  
260 consumption. Medical history including pre-pregnancy height and weight, parity, history of  
261 infertility treatment, existing chronic illnesses, history of GDM and/or GH, family history of  
262 DM, and reasons behind potential PA restriction during early pregnancy will also be  
263 collected.

264

### 265 ***Fitbit activity tracker and mobile application***

266 At recruitment, each participant is given a wristband activity tracker (Fitbit) that will be  
267 connected via Bluetooth to a Fitbit application downloaded onto her smartphone. Education  
268 on device and application will be carried out. The tracker is worn daily from recruitment to

269 end of 20 weeks gestation inclusive, except during bathing or water activities. Participants are  
270 advised to synchronize the tracker data at least once a week. For data to be valid, wear-time  
271 must be at least 4 days per week (including one weekend day) and at least 10 hours per day.

272 Steps per day will be recorded by the tracker. Data will be reported as continuous and  
273 categorical variables. Continuous variables include mean weekday and weekend steps per day  
274 and mean steps per day in first and second trimesters. Categorical variables include  
275 classification into a CDC recommendation-based steps per day physical inactivity/activity  
276 continuum defined as follows: (1) <5000 (sedentary); (2) 5000-7499 (low active); (3) 7500-  
277 9999 (somewhat active); (4) 10,000-12,499 (active); and (5)  $\geq 12,500$  (highly active)<sup>35</sup>.

278

### 279 ***International Physical Activity Questionnaire (IPAQ)***

280 The IPAQ long version will be self-administered during the first visit at less than 12 weeks  
281 gestation in the first trimester and again between 20-24 weeks gestation in the second  
282 trimester. It is a set of 4 questionnaires assessing 5 activity domains (occupation,  
283 transportation, household, leisure, and sedentary) independently in the past 7 days, and may  
284 be administered via self or telephone<sup>42</sup>. Well-established and validated in adults aged 15-69  
285 years, it is available in both English and Chinese<sup>43,44</sup>. It has been used in studies involving  
286 pregnant women<sup>29,45</sup>.

287 Data will be reported as continuous and categorical variables. Continuous variables include  
288 median MET-minutes per week (MET-min/wk) and interquartile ranges computed for each  
289 domain, subdomain (walking, moderate-intensity PA and vigorous-intensity PA) and overall  
290 total PA. MET or metabolic equivalent is a unit that measures energy expenditure in  
291 multiples of the resting metabolic rate<sup>46</sup>. Categorical variables include classification into low,  
292 moderate, high levels of PA according to the IPAQ scoring protocol.

293

### 294 ***Medical record data***

295 Additional data to be collected include ethnicity, weight changes during pregnancy, weight at  
296 6 weeks post-delivery, obstetric outcomes of GDM, GH, preeclampsia and IUGR, and  
297 neonatal outcomes comprising APGAR scores, preterm birth, macrosomia, and neonatal  
298 hypoglycemia.

299

### 300 ***Participant feedback form***

301 After the end of 20 weeks gestation, experience with the activity tracker and mobile  
302 application in terms of usability and troubleshooting will be evaluated. Compliance level will  
303 be quantified by number of days per week.

304

### 305 **Statistics**

306 Descriptive statistics of PA levels in the 1st and early 2nd trimester will be presented.  
307 Categorical variables will be presented as n (%) while continuous variables will be presented

1  
2  
3 308 as mean (SD) or median (IQR). Mean steps per day and median MET-minutes per week  
4 309 between semesters will be compared using paired Student's t-test and Wilcoxon signed-rank  
5 310 test respectively. McNemar's test will be used to compare sedentary behavior between  
6 311 semesters. Similar tests will be employed to assess for a difference in PA levels between  
7 312 weekdays and weekends.

8  
9  
10 313 Binary logistic regression will be used to evaluate the association of early pregnancy PA with  
11 314 GDM and/or GH. Crude (unadjusted) and adjusted regression models will be included.  
12 315 Potential confounders will be identified a priori based on literature review and controlled for  
13 316 in the regression analyses. Potential interactions between covariates and early pregnancy PA  
14 317 will be tested using cross-product terms. Secondary analyses on the bio-socio-demographic  
15 318 factors associated with sedentary behavior, as well as the association between early  
16 319 pregnancy PA level and maternal weight at 6 weeks post-delivery, will follow the methods of  
17 320 the primary analyses, but are exploratory having not been powered to formally test the  
18 321 hypotheses. All regression analyses will be presented as odds ratios (ORs) with 95%  
19 322 confidence intervals (CIs).

20 323 Statistical analyses will be performed using IBM SPSS Statistics version 23.0 (IBM Corp.,  
21 324 Armonk, N.Y., USA). *P* values of <0.05 will be considered statistically significant.

22  
23  
24  
25  
26 325

### 27 28 326 **Safety parameters**

29  
30 327 Adverse effects and device monitoring will be carried out at the subsequent 4-weekly routine  
31 328 prenatal visits. Any adverse skin reaction to the wristband will be recorded. Participation will  
32 329 be stopped at any time the Principal Investigator decides that continuing on could be harmful  
33 330 to the participant.

34 331

### 35 36 37 332 **Data management**

38  
39 333 All data will be coded for confidentiality. Hardcopy data will be stored at the research site  
40 334 under lock and key. Electronic data can only be accessed and retrieved from the secured  
41 335 website by the participant and research team. Electronic data will be exported on a fortnightly  
42 336 basis. All data obtained will be entered into and stored on the institution Research Electronic  
43 337 Data Capture (REDCap) system, a centralised secured data management server with  
44 338 password access. Data integrity monitoring will be carried out monthly by the principal  
45 339 investigator and co-investigators if deemed necessary.

46  
47  
48  
49 340

### 50 341 **Patient and Public Involvement**

51 342 Patients and the public were not involved in the development of the research question and  
52 343 outcome measures.

53  
54 344

55  
56 345

57  
58 346

1  
2  
3 347 Ethics and dissemination  
4

5 348 Ethical approval was obtained from the Centralised Institutional Review Board of SingHealth  
6 349 (reference 2017/2836). Informed written consent will be sought from all participants.  
7

8 350 Results from this study will be submitted to the funding organization and peer-reviewed  
9 351 journals for consideration of publication both online and in print. Results will also be  
10 352 presented at relevant meetings, conferences and medical forums in either oral or poster  
11 353 formats.  
12  
13

14 354

15 355

16 356

17 357

18 358

19 359

20 360

21 361

22 362

23 363

24 364

25 365

26 366

27 367

28 368

29 369

30 370

31 371

32 372

33 373

34 374

35 375

36 376

37 377

38 378

For peer review only



1  
2  
3 379 Conclusion  
4

5 380 The I-ACT study aims to be the first comprehensive study objectively evaluating the PA  
6 381 levels and patterns in early pregnancy, and their association with GDM and/or GH in the  
7 382 multi-ethnic population of Singapore. In addition to addressing these important scientific  
8 383 knowledge gaps, from a clinical perspective, the study itself may increase awareness of PA  
9 384 during early pregnancy while demonstrating the potential of wearable activity trackers as an  
10 385 objective measure of PA in health research. More importantly, we hope the results of the  
11 386 study facilitate the identification of high-risk mothers-to-be for targeted intervention, and  
12 387 help formulate strategies for interventional efforts.  
13  
14  
15  
16 388  
17  
18 389  
19  
20 390  
21 391  
22  
23 392  
24  
25 393  
26  
27 394  
28  
29 395  
30  
31 396  
32  
33 397  
34  
35 398  
36  
37 399  
38  
39 400  
40  
41 401  
42  
43 402  
44  
45 403  
46  
47 404  
48  
49 405  
50  
51 406  
52  
53 407  
54  
55 408  
56  
57 409  
58  
59 410  
60 411

For peer review only

1  
2  
3 412 Acknowledgements  
4

5 413 The authors would like to thank Professor Satvinder Singh Dhaliwal for providing statistical  
6 414 advice during the conception of this study.  
7

8 415

9 416

10 417

11 418

12 419

13 420

14 421

15 422

16 423

17 424

18 425

19 426

20 427

21 428

22 429

23 430

24 431

25 432

26 433

27 434

28 435

29 436

30 437

31 438

32 439

33 440

34 441

35 442

For peer review only

443 References

- 444 1. Caspersen CJ, Powell KE, Christenson GM. Physical activity, exercise, and physical  
445 fitness: definitions and distinctions for health-related research. *Public Health Rep.*  
446 1985;100(2):126-131.
- 447 2. ACOG Committee Opinion No. 650: Physical Activity and Exercise During Pregnancy  
448 and the Postpartum Period. *Obstet Gynecol.* 2015;126(6):e135-142.
- 449 3. Centre for Disease Control and Prevention.  
450 <https://www.cdc.gov/physicalactivity/basics/pregnancy/index.htm>. Accessed 10 July,  
451 2017.
- 452 4. Nascimento SL, Surita FG, Cecatti JG. Physical exercise during pregnancy: a  
453 systematic review. *Current opinion in obstetrics & gynecology.* 2012;24(6):387-394.
- 454 5. Bulletins-Obstetrics CoP. ACOG Practice Bulletin No. 190: Gestational Diabetes  
455 Mellitus. *Obstet Gynecol.* 2018;131(2):e49-e64.
- 456 6. Zhu Y, Zhang C. Prevalence of Gestational Diabetes and Risk of Progression to Type  
457 2 Diabetes: a Global Perspective. *Curr Diab Rep.* 2016;16(1):7.
- 458 7. Yew TW, Khoo CM, Thai AC, Kale AS, Yong EL, Tai ES. The Prevalence of  
459 Gestational Diabetes Mellitus Among Asian Females is Lower Using the New 2013  
460 World Health Organization Diagnostic Criteria. *Endocr Pract.* 2014;20(10):1064-1069.
- 461 8. Lim WY, Saw SM, Tan KH, Yeo GS, Kwek KY. A cohort evaluation on arterial  
462 stiffness and hypertensive disorders in pregnancy. *BMC Pregnancy Childbirth.*  
463 2012;12:160.
- 464 9. Nelson-Piercy C. *Handbook of obstetric medicine.* Fifth edition. ed. Boca Raton: CRC  
465 Press, Taylor & Francis Group; 2015.
- 466 10. Rayanagoudar G, Hashi AA, Zamora J, Khan KS, Hitman GA, Thangaratinam S.  
467 Quantification of the type 2 diabetes risk in women with gestational diabetes: a  
468 systematic review and meta-analysis of 95,750 women. *Diabetologia.*  
469 2016;59(7):1403-1411.
- 470 11. Nasiri-Amiri F, Bakhtiari A, Faramarzi M, Adib Rad H, Pasha H. The Association  
471 Between Physical Activity During Pregnancy and Gestational Diabetes Mellitus: A  
472 Case-Control Study. *Int J Endocrinol Metab.* 2016;14(3):e37123.
- 473 12. Tobias DK, Zhang C, van Dam RM, Bowers K, Hu FB. Physical activity before and  
474 during pregnancy and risk of gestational diabetes mellitus: a meta-analysis. *Diabetes*  
475 *Care.* 2011;34(1):223-229.
- 476 13. Dempsey JC, Sorensen TK, Williams MA, et al. Prospective study of gestational  
477 diabetes mellitus risk in relation to maternal recreational physical activity before and  
478 during pregnancy. *Am J Epidemiol.* 2004;159(7):663-670.
- 479 14. Dempsey JC, Butler CL, Sorensen TK, et al. A case-control study of maternal  
480 recreational physical activity and risk of gestational diabetes mellitus. *Diabetes Res*  
481 *Clin Pract.* 2004;66(2):203-215.
- 482 15. Oken E, Ning Y, Rifas-Shiman SL, Radesky JS, Rich-Edwards JW, Gillman MW.  
483 Associations of physical activity and inactivity before and during pregnancy with  
484 glucose tolerance. *Obstet Gynecol.* 2006;108(5):1200-1207.
- 485 16. Chasan-Taber L, Schmidt MD, Pekow P, et al. Physical activity and gestational diabetes  
486 mellitus among Hispanic women. *Journal of women's health (2002).* 2008;17(6):999-  
487 1008.
- 488 17. Yin YN, Li XL, Tao TJ, Luo BR, Liao SJ. Physical activity during pregnancy and the  
489 risk of gestational diabetes mellitus: a systematic review and meta-analysis of  
490 randomised controlled trials. *Br J Sports Med.* 2014;48(4):290-295.

- 1  
2  
3 491 18. Marcoux S, Brisson J, Fabia J. The effect of leisure time physical activity on the risk of  
4 492 pre-eclampsia and gestational hypertension. *J Epidemiol Community Health*.  
5 493 1989;43(2):147-152.
- 6 494 19. Vollebregt KC, Wolf H, Boer K, van der Wal MF, Vrijkotte TG, Bonsel GJ. Does  
7 495 physical activity in leisure time early in pregnancy reduce the incidence of preeclampsia  
8 496 or gestational hypertension? *Acta Obstet Gynecol Scand*. 2010;89(2):261-267.
- 9 497 20. Spracklen CN, Ryckman KK, Triche EW, Saftlas AF. Physical Activity During  
10 498 Pregnancy and Subsequent Risk of Preeclampsia and Gestational Hypertension: A Case  
11 499 Control Study. *Matern Child Health J*. 2016;20(6):1193-1202.
- 12 500 21. Saftlas AF, Logsden-Sackett N, Wang W, Woolson R, Bracken MB. Work, leisure-  
13 501 time physical activity, and risk of preeclampsia and gestational hypertension. *Am J*  
14 502 *Epidemiol*. 2004;160(8):758-765.
- 15 503 22. Richardsen KR, Mdala I, Berntsen S, et al. Objectively recorded physical activity in  
16 504 pregnancy and postpartum in a multi-ethnic cohort: association with access to  
17 505 recreational areas in the neighbourhood. *The international journal of behavioral*  
18 506 *nutrition and physical activity*. 2016;13:78.
- 19 507 23. Morkrid K, Jennum AK, Berntsen S, et al. Objectively recorded physical activity and the  
20 508 association with gestational diabetes. *Scand J Med Sci Sports*. 2014;24(5):e389-397.
- 21 509 24. Zhang Y, Dong S, Zuo J, Hu X, Zhang H, Zhao Y. Physical activity level of urban  
22 510 pregnant women in Tianjin, China: a cross-sectional study. *PLoS One*.  
23 511 2014;9(10):e109624.
- 24 512 25. Guelfi KJ, Wang C, Dimmock JA, Jackson B, Newnham JP, Yang H. A comparison of  
25 513 beliefs about exercise during pregnancy between Chinese and Australian pregnant  
26 514 women. *BMC Pregnancy Childbirth*. 2015;15:345.
- 27 515 26. Padmapriya N, Shen L, Soh SE, et al. Physical Activity and Sedentary Behavior  
28 516 Patterns Before and During Pregnancy in a Multi-ethnic Sample of Asian Women in  
29 517 Singapore. *Matern Child Health J*. 2015;19(11):2523-2535.
- 30 518 27. Padmapriya N, Bernard JY, Liang S, et al. Associations of physical activity and  
31 519 sedentary behavior during pregnancy with gestational diabetes mellitus among Asian  
32 520 women in Singapore. *BMC Pregnancy Childbirth*. 2017;17(1):364.
- 33 521 28. Strath SJ, Kaminsky LA, Ainsworth BE, et al. Guide to the assessment of physical  
34 522 activity: Clinical and research applications: a scientific statement from the American  
35 523 Heart Association. *Circulation*. 2013;128(20):2259-2279.
- 36 524 29. Harrison CL, Thompson RG, Teede HJ, Lombard CB. Measuring physical activity  
37 525 during pregnancy. *The international journal of behavioral nutrition and physical*  
38 526 *activity*. 2011;8:19.
- 39 527 30. Evenson KR, Goto MM, Furberg RD. Systematic review of the validity and reliability  
40 528 of consumer-wearable activity trackers. *The international journal of behavioral*  
41 529 *nutrition and physical activity*. 2015;12:159.
- 42 530 31. Lee JM, Kim Y, Welk GJ. Validity of consumer-based physical activity monitors.  
43 531 *Medicine and science in sports and exercise*. 2014;46(9):1840-1848.
- 44 532 32. Ferguson T, Rowlands AV, Olds T, Maher C. The validity of consumer-level, activity  
45 533 monitors in healthy adults worn in free-living conditions: a cross-sectional study. *The*  
46 534 *international journal of behavioral nutrition and physical activity*. 2015;12:42.
- 47 535 33. Cheatham SW, Stull KR, Fantigrassi M, Motel I. The efficacy of wearable activity  
48 536 tracking technology as part of a weight loss program: a systematic review. *J Sports Med*  
49 537 *Phys Fitness*. 2018;58(4):534-548.
- 50 538 34. Feehan LM, Geldman J, Sayre EC, et al. Accuracy of Fitbit Devices: Systematic  
51 539 Review and Narrative Syntheses of Quantitative Data. *JMIR Mhealth Uhealth*.  
52 540 2018;6(8):e10527.

- 1  
2  
3 541 35. Tudor-Locke C, Hatano Y, Pangrazi RP, Kang M. Revisiting "how many steps are  
4 542 enough?". *Medicine and science in sports and exercise*. 2008;40(7 Suppl):S537-543.  
5 543 36. Tudor-Locke C, Johnson WD, Katzmarzyk PT. Relationship between accelerometer-  
6 544 determined steps/day and other accelerometer outputs in US adults. *Journal of physical*  
7 545 *activity & health*. 2011;8(3):410-419.  
8 546 37. Diaz KM, Krupka DJ, Chang MJ, et al. Fitbit(R): An accurate and reliable device for  
9 547 wireless physical activity tracking. *Int J Cardiol*. 2015;185:138-140.  
10 548 38. St-Laurent A, Mony MM, Mathieu ME, Ruchat SM. Validation of the Fitbit Zip and  
11 549 Fitbit Flex with pregnant women in free-living conditions. *J Med Eng Technol*.  
12 550 2018;42(4):259-264.  
13 551 39. de Seymour J, Chia A, Colega M, et al. Maternal Dietary Patterns and Gestational  
14 552 Diabetes Mellitus in a Multi-Ethnic Asian Cohort: The GUSTO Study. *Nutrients*.  
15 553 2016;8(9).  
16 554 40. International Association of Diabetes Pregnancy Study Groups Consensus Panel,  
17 555 Metzger BE, Gabbe SG, et al. International association of diabetes and pregnancy study  
18 556 groups recommendations on the diagnosis and classification of hyperglycemia in  
19 557 pregnancy. *Diabetes Care*. 2010;33(3):676-682.  
20 558 41. American College of Obstetricians Gynecologists Task Force on Hypertension in  
21 559 Pregnancy. Hypertension in pregnancy. Report of the American College of  
22 560 Obstetricians and Gynecologists' Task Force on Hypertension in Pregnancy. *Obstet*  
23 561 *Gynecol*. 2013;122(5):1122-1131.  
24 562 42. International Physical Activity Questionnaire.  
25 563 [https://sites.google.com/site/theipaq/questionnaire\\_links](https://sites.google.com/site/theipaq/questionnaire_links).  
26 564 43. Craig CL, Marshall AL, Sjostrom M, et al. International physical activity questionnaire:  
27 565 12-country reliability and validity. *Medicine and science in sports and exercise*.  
28 566 2003;35(8):1381-1395.  
29 567 44. Macfarlane D, Chan A, Cerin E. Examining the validity and reliability of the Chinese  
30 568 version of the International Physical Activity Questionnaire, long form (IPAQ-LC).  
31 569 *Public Health Nutr*. 2011;14(3):443-450.  
32 570 45. Kinnunen TI, Pasanen M, Aittasalo M, et al. Preventing excessive weight gain during  
33 571 pregnancy - a controlled trial in primary health care. *Eur J Clin Nutr*. 2007;61(7):884-  
34 572 891.  
35 573 46. Jette M, Sidney K, Blumchen G. Metabolic equivalents (METS) in exercise testing,  
36 574 exercise prescription, and evaluation of functional capacity. *Clin Cardiol*.  
37 575 1990;13(8):555-565.

576

577

578

579

580

581

582

583

584

585

586

587

588

589

1  
2  
3 590 Author statement  
4

5 591 MC was involved in all aspects of the study from conception, design, recruitment and  
6 592 manuscript writing. KHT and SBA provided critical review of the design and writing. As  
7 593 Principle Investigator, SBA takes overall responsibility for the work. All authors agree to be  
8 594 accountable for their work.  
9

10 595

11  
12 596 Funding statement  
13

14 597 This work is supported by the AM-ETHOS Duke-NUS Medical Student Fellowship (AM-  
15 598 ETHOS01/FY2017/01-A01). In addition, the primary author is supported by the Integrated  
16 599 Platform for Research in Advancing Metabolic Health Outcomes in Women and Children  
17 600 (IPRAMHO).  
18

19 601

20  
21 602 Conflict of interests  
22

23 603 The authors declare no potential conflicts of interest with respect to the authorship and/or  
24 604 publication of this article.  
25

26 605

27  
28 606 Word Count: 2415  
29

30 607

31  
32 608 Figure Legend  
33

34 609 Figure 1. Timeline of the I-ACT prospective cohort study.

35 610 †Participants will continue to attend routine antenatal visits throughout the study period  
36 611 during which blood pressure monitoring will be done.  
37

38 612

39 613

40 614

41 615

42 616

43 617

44 618

45 619

46 620

47 621

48 622

49 623

50 624

51 625

52 626

53 627

54 628

55 629

56 630  
57  
58  
59  
60

1  
2  
3  
4  
5  
6  
7  
8  
9  
10  
11  
12  
13  
14  
15  
16  
17  
18  
19  
20  
21  
22  
23  
24  
25  
26  
27  
28  
29  
30  
31  
32  
33  
34  
35  
36  
37  
38  
39  
40  
41  
42  
43  
44  
45  
46  
47  
48  
49  
50  
51  
52  
53  
54  
55  
56  
57  
58  
59  
60



Figure 1. Timeline of the I-ACT prospective cohort study.  
 †Participants will continue to attend routine antenatal visits throughout the study period during which blood pressure monitoring will be done.

338x190mm (300 x 300 DPI)
